1 **Title: Balancing positive and negative selection: *in vivo* evolution of *Candida lusitaniae* MRR1**

2

3 Running Title: Selection for and against constitutive Mrr1 activity

4

5 Elora G. Demers<sup>a</sup>, Jason Stajich<sup>b</sup>, Alix Ashare<sup>c</sup>, Patricia Occhipinti<sup>a</sup>, Deborah A. Hogan<sup>a#</sup>

6 <sup>a</sup>Department of Microbiology and Immunology, Geisel School of Medicine at Dartmouth,

7 Hanover, New Hampshire, USA

8 <sup>b</sup>Department of Microbiology & Plant Pathology and Institute for Integrative Genome Biology,

9 University of California-Riverside, Riverside, California, USA.

10 <sup>c</sup>Dartmouth-Hitchcock Medical Center, Section of Pulmonary and Critical Care Medicine,

11 Lebanon, NH, USA

12 <sup>#</sup>Corresponding author:

13 Department of Microbiology and Immunology, Geisel School of Medicine at Dartmouth

14 Rm 208 Vail Building, Hanover, NH 03755

15 E-mail: [deborah.a.hogan@dartmouth.edu](mailto:deborah.a.hogan@dartmouth.edu)

16 Tel: (603) 650-1252

17 Fax: (603) 650-1318

18

19 Keywords: *Candida lusitaniae*, Mrr1, evolution, drug resistance, fluconazole, yeast, hydrogen

20 peroxide, chronic infection, cystic fibrosis, *Candida albicans*, *Candida auris*

## 21 **Abstract**

22           The evolution of pathogens in response to selective pressures present during chronic  
23 infections can influence persistence, virulence, and the outcomes of antimicrobial therapy.  
24 Because subpopulations within an infection can be spatially separated and the host environment  
25 can fluctuate, an appreciation of the pathways under selection may be most easily revealed through  
26 the analysis of numerous isolates from single infections. Here, we continued our analysis of a set  
27 of clonally-derived *Clavispora (Candida) lusitaniae* isolates from a single chronic lung infection  
28 with a striking enrichment in the number of alleles of *MRR1*. Genetic and genomic analyses found  
29 evidence for repeated acquisition of gain-of-function mutations that conferred constitutive Mrr1  
30 activity. In the same population, there were multiple alleles with both gain-of-function mutations  
31 and secondary suppressor mutations that either attenuated or abolished the constitutive activity  
32 suggesting the presence of counteracting selective pressures. Our studies demonstrated tradeoffs  
33 between high Mrr1 activity, which confers resistance to the antifungal fluconazole, host factors,  
34 and bacterial products through its regulation of *MDR1*, and resistance to hydrogen peroxide, a  
35 reactive oxygen species produced in the neutrophilic environment associated with this infection.  
36 This inverse correlation between high Mrr1 activity and hydrogen peroxide resistance was  
37 observed in multiple *Candida* species and in serial analysis of populations from this individual  
38 collected over three years. These data lead us to propose that dynamic or variable selective  
39 pressures can be reflected in population genomics and that these dynamics can complicate the drug  
40 resistance profile of the population.

## 41 **Importance**

42           Understanding microbial evolution within patients is critical for managing chronic  
43 infections and understanding host-pathogen interactions. Here, our analysis of multiple *MRR1*  
44 alleles in isolates from a single *Clavispora (Candida) lusitaniae* infection revealed the selection  
45 for both high and low Mrr1 activity. Our studies reveal tradeoffs between high Mrr1 activity, which  
46 confers resistance to the commonly used antifungal fluconazole, host antimicrobial peptides and  
47 bacterial products, and resistance to hydrogen peroxide. This work suggests that spatial or temporal  
48 differences within chronic infections can support a large amount of dynamic and parallel evolution,  
49 and that Mrr1 activity is under both positive and negative selective pressure to balance different  
50 traits that are important for microbial survival.

## 51 **Introduction**

52           Understanding the positive and negative selective pressures that shape drug resistance  
53 profiles in microbial populations is critical for combating the development of antimicrobial  
54 resistance, an ever-increasing problem in clinical settings. Increased drug resistance in bacteria  
55 and fungi has been associated with clinically- and agriculturally-used antimicrobial agents  
56 (reviewed in (1-3)), and drug resistance elements may be selected for based on their ability to  
57 protect against factors produced by other microbes or plant, animal, and insect hosts (4, 5). Based  
58 on the analysis of bacterial isolates of *Burkholderia dolosa* or *Pseudomonas aeruginosa* from  
59 single patients and across cohorts of patients, it is clear that *in vivo* factors can lead to the repeated  
60 selection for subpopulations with the same genes or pathways mutated (6-8). Furthermore, there  
61 is evidence that pathways can be upregulated then downregulated in the same phylogenetic  
62 lineages. For example, suppressor mutations within *P. aeruginosa algU* frequently arise in strains  
63 with high AlgU signaling caused by mutations in the gene encoding the AlgU repressor MucA (9).  
64 Less is known about the negative selective pressures acting against sustained microbial resistance.

65           In Demers *et al.* (10), we described a set of twenty recently-diverged *Clavispora (Candida)*  
66 *lusitaniae* isolates obtained from the lung infection of a single individual with cystic fibrosis (CF).  
67 *C. lusitaniae* is among the emerging non-*albicans* *Candida* spp. that cause life threatening  
68 disseminated infections in individuals who are immunocompromised (11, 12), and can cause  
69 infections of the gastrointestinal tract (13-15), surgical sites, or implanted devices in  
70 immunocompetent individuals. *C. lusitaniae* is notorious for its rapid development of resistance  
71 to antifungal drugs including amphotericin B, azoles and echinocandins (14, 16-19) and, relative  
72 to *Candida albicans* and other *Candida* species that are both opportunistic pathogens and members  
73 of the mycobiome, it is more closely related to *Candida auris*, a species in which multi-drug

74 resistant isolates have caused hospital-associated outbreaks (20-26). Our previous analyses of  
75 heterogeneity in fluconazole (FLZ) resistance among these isolates identified numerous distinct  
76 alleles of *MRR1* (*CLUG\_00542*). Multiple alleles encoded gain-of-function (GOF) mutations  
77 causing constitutive Mrr1 activity, which, as in other *Candida* species, increased expression of  
78 *MDR1* and Mdr1 multidrug efflux pump activity (10, 27-32). At the time that these isolates were  
79 recovered, the patient had no history of antifungal treatment, suggesting that selection for  
80 constitutively active Mrr1 variants may have been driven by the need for resistance to other host-  
81 or microbe-produced compounds. Within this study, however, we found multiple lineages with  
82 recently evolved *MRR1* alleles that rendered cells more sensitive to FLZ than even *mrr1*Δ strains.  
83 Here, we address the perplexing question of why this population had recently diverged *MRR1*  
84 alleles that encoded both high and low Mrr1 activity. To do so, we expressed both native and  
85 synthesized *MRR1* alleles that represent intermediates during *MRR1* evolution in a common  
86 genetic background and tested the effects of these alleles on growth in *in vivo* relevant conditions.  
87 Using genetics and genomics, we concluded that multiple *C. lusitaniae* *MRR1* alleles that  
88 conferred low Mrr1 activity resulted from initial mutation that caused constitutive Mrr1 activity  
89 followed by a second mutation that either suppressed constitutive activation or inactivated the  
90 protein. Constitutive Mrr1 activity caused increased sensitivity to a variety of biologically relevant  
91 compounds including hydrogen peroxide (H<sub>2</sub>O<sub>2</sub>) and suppression of constitutive Mrr1 activity  
92 rescued growth under many of these conditions. Monitoring populations from respiratory samples  
93 from this subject over time supports the model that there are opposing selective pressures *in vivo*  
94 that select for and against constitutive Mrr1 activity, as reflected by the tradeoff between FLZ and  
95 H<sub>2</sub>O<sub>2</sub> resistance seen over time. These data explain the persistence of a heterogeneous fungal

96 population and underscores the complexity and parallelism of evolution that is possible in the  
97 human lung during chronic disease.

98

## 99 **Results**

### 100 **Naturally evolved *C. lusitaniae* *MRR1* alleles confer altered Mrr1 activity and FLZ resistance**

101 Each of the twenty closely-related *C. lusitaniae* isolates from a single individual contained  
102 at least one nonsynonymous single nucleotide polymorphism (SNP) or single nucleotide insertion  
103 or deletion (indel) in *MRR1* relative to the deduced *MRR1* sequence of their most recent common  
104 ancestor (*MRR1<sup>ancestral</sup>*) (Fig. 1A) (10). To determine the impact of specific mutations in *MRR1* on  
105 Mrr1 activity, we expressed different *MRR1* alleles in a common genetic background in which the  
106 native *MRR1* had been deleted (U04 *mrr1*Δ). Deletion of *MRR1* in the FLZ-resistant strain U04  
107 reduced the FLZ minimum inhibitory concentration (MIC) from 32 μg/ml to 4 μg/ml (10) and the  
108 decrease in MIC was complemented by restoring the native *MRR1<sup>Y813C</sup>* allele (Fig. 1B).  
109 Complementation of U04 *mrr1*Δ with the *MRR1<sup>ancestral</sup>* allele led to a FLZ MIC of 1 μg/ml which  
110 was 4-fold lower ( $P < 0.0001$ ) than the FLZ MIC of U04 *mrr1*Δ, suggesting that *MRR1<sup>ancestral</sup>* had a  
111 function that reduced the FLZ MIC (Fig. 1B). Expression of an *MRR1* allele from a FLZ-sensitive  
112 isolate in the population (*MRR1<sup>L1191H+Q1197\*</sup>*) also reduced the FLZ MIC to levels comparable to  
113 those for *MRR1<sup>ancestral</sup>* (0.5-1 μg/ml) (Fig. 1B). Similar correlations between *MRR1* allele and FLZ  
114 MIC were observed when the *MRR1<sup>ancestral</sup>*, *MRR1<sup>Y813C</sup>*, and *MRR1<sup>L1191H+Q1197\*</sup>* alleles were expressed  
115 in a *mrr1*Δ derivative of the FLZ-sensitive strain U05, which indicated that strain background did  
116 not contribute to the FLZ MIC conferred by different *MRR1* alleles (Fig. 1C). We previously  
117 published that FLZ resistance correlated with expression of *MDR1* (10), also referred to as *MFS7*

118 (19). Deletion of *MDR1* reduced the MIC, and the MIC was even lower in U04 *mrr1*Δ*mdr1*Δ (Fig.  
119 S1A) indicating that the moderately higher levels of FLZ resistance in U04 *mrr1*Δ compared to a  
120 strain with *MRR1*<sup>ancestral</sup> was *MDR1*-dependent.

121 RNA-sequencing (RNA-seq) analysis validated the previously published result that *MDR1*  
122 correlated with the FLZ MIC for the different Mrr1 variants (10). The expression of *MGD1* and  
123 *MGD2*, two *C. lusitaniae* genes shown to be Mrr1-regulated, correlated with the expression of  
124 *MDR1* (Fig. 1D and Table S1) (10, 13, 33). Gene expression differences between U04 (*MRR1*<sup>Y813C</sup>),  
125 U04 *mrr1*Δ, and U04 *mrr1*Δ +*MRR1*<sup>Y813C</sup> found that *mrr1*Δ is fully complemented upon return of  
126 *MRR1*<sup>Y813C</sup> to the native locus (Fig. 1D and Fig. S2A for correlation plot) and that Mrr1 positively  
127 and negative regulates a large set of genes. Furthermore, a correlation analysis found that U04  
128 *mrr1*Δ +*MRR1*<sup>ancestral</sup> and U04 *mrr1*Δ +*MRR1*<sup>L1191H+Q1197\*</sup> were similar to each other but distinct  
129 from the *mrr1*Δ (Fig. S2A and 1B). A linear model comparing these strains identified forty-one  
130 genes with at least a 2-fold change in expression and corrected *P* value <0.05 (FDR). Comparison  
131 of non-isogenic *C. lusitaniae* strains similarly identified at least fourteen of the genes in Table S1  
132 as putatively Mrr1-regulated (10, 13). Eighteen genes were homologs or had similar predicted  
133 functions as genes previously published as regulated by *C. albicans* Mrr1 (29), including *MDR1*,  
134 *FLU1* and multiple putative methylglyoxal reductases encoded by *GRP2*-like genes, such as  
135 *MGD1* and *MGD2* (Fig. 1D and Table S1). Other genes within the Mrr1 regulon are discussed  
136 further below.

137 The unexpected finding that FLZ MIC was higher upon deletion of *MRR1* relative to a  
138 strain with *MRR1*<sup>ancestral</sup> or an allele from a FLZ-sensitive strain was also observed in distantly-  
139 related *C. lusitaniae* strains, ATCC 42720 and DH2383 (FLZ MICs of ~1-2 μg/ml). In both cases,  
140 deletion of *MRR1* led to a 2-4-fold increase in FLZ MIC to 4-8 μg/ml (Fig. S1B, *P*<0.001). The

141 increase in FLZ MIC in *mrr1*Δ strains was not due to introduction of the selectable marker, *NAT1*,  
142 which encodes a nourseothricin acetyltransferase (34), as expression of *NAT1* from an intergenic  
143 site in the FLZ-sensitive U05 strain did not increase the FLZ MIC (Fig. S1C). These data led us to  
144 hypothesize that some Mrr1 variants (*MRR1*<sup>Y813C</sup>) lead to high Mdr1 activity while other Mrr1  
145 variants (both *MRR1*<sup>ancestral</sup> and the recently-diverged *MRR1*<sup>L1191H+Q1197\*</sup> alleles) repressed the  
146 expression of at least some Mrr1-controlled genes, such as *MDR1*. Indeed, the RNA-Seq analysis  
147 identified six genes, including *MDR1*, that while positively regulated when Mrr1 was  
148 constitutively active, were more highly expressed in U04 *mrr1*Δ than those strains encoding low  
149 activity Mrr1 variants (Fig. 1D and S2B). These data suggest that, for a small subset of Mrr1-  
150 regulated genes, including *MDR1*, low activity Mrr1 variants directly or indirectly inhibit gene  
151 expression.

## 152 **Truncation of *MRR1* has varied effects on Mrr1 activity and inducibility in clinical isolates**

153 All twenty sequenced clinical *C. lusitaniae* isolates from a single human subject (Fig. 1A)  
154 had *MRR1* alleles with either one or two nonsynonymous mutations relative to *MRR1*<sup>ancestral</sup>, and  
155 we found that *C. lusitaniae* isolates with two mutations in *MRR1* had a significantly lower average  
156 FLZ MIC than isolates with a single *MRR1* mutation (Fig. 2A, *P*<0.001) (10). Interestingly, six of  
157 the seven *MRR1* alleles in the “two mutation” set encoded premature stop codons, resulting in loss  
158 of 34-906 amino acids (Fig. 2B). There were two instances in which the same mutation was found  
159 with different nonsense mutations (\*) or single nucleotide indels that led to early termination (t):  
160 *MRR1*<sup>Y1126N+P1174P(t)</sup> or *MRR1*<sup>Y1126N+S359\*</sup>, and *MRR1*<sup>R1066S+K912N(t)</sup>, *MRR1*<sup>R1066S+Y1061\*</sup> or *MRR1*<sup>R1066S+G1231\*</sup>  
161 (common mutation in bold, Fig. 1A) suggesting a complex evolutionary history for these alleles.

162 To better understand the effects of *MRR1* mutations on Mrr1 activity, we analyzed the  
163 effects of a chemical inducer of Mrr1 activity, benomyl (35-37), on *MDR1* expression. Benomyl



164 strongly induced *MDR1* expression in an *Mrr1*-dependent manner in the FLZ-sensitive strain  
165 ATCC 42720 (Fig. 2C) and, to a lesser extent, in the FLZ-resistant strain U04, which has high  
166 basal *MDR1* expression (Fig. 2D) (10). Quantitative RT-PCR analysis of *MDR1* expression and  
167 induction by benomyl in this collection of clinical isolates with different *Mrr1* variants found that  
168 the two isolates with the lowest basal *MDR1* expression and lowest FLZ MIC (U05 and U07) had  
169 the greatest induction by benomyl (34- and 27-fold, respectively) (Fig. 2D). Three isolates, L11,  
170 L12 and U06, had intermediate FLZ MICs and *MDR1* expression levels, and did not show benomyl  
171 induction, similar to *mrr1*Δ, and all encoded *Mrr1* variants lacking greater than 200 amino acids  
172 leading us to propose that these mutations caused a loss of *Mrr1* function (Fig. 2D). Other isolates  
173 showed a correlation between higher basal *MDR1* levels and elevated FLZ MICs, and this pattern  
174 was associated with lower relative levels of benomyl induction (Fig. 2D).

175 **Premature stop codons repeatedly arose in constitutively active *Mrr1* variants and caused**  
176 **either a loss of constitutive *Mrr1* activity or complete loss of function**

177 In light of the mixed effects that these two-mutation *MRR1* alleles had on *Mrr1* activity,  
178 we sought to determine the individual effects of mutations within each allele with a focus on the  
179 two strains with the lowest basal *MDR1* expression and the strongest induction of *MDR1* in  
180 response to benomyl: *MRR1*<sup>L1191H+Q1197\*</sup> (in U05) and *MRR1*<sup>Y1126N+P1174P(t)</sup> (in U07) (Fig. 3A and 3B).  
181 We found that the *MRR1*<sup>L1191H</sup> mutation caused a 32-fold increase in FLZ MIC (Fig. 3C) and 22-  
182 fold increase in *MDR1* expression (Fig. 3D) compared to *MRR1*<sup>ancestral</sup> indicating that, like the  
183 *Mrr1*-Y813C variant, *Mrr1*-L1191H was constitutively active. In contrast, *MRR1*<sup>Q1197\*</sup>, which  
184 caused the loss of 68 amino acids from the C-terminus of *Mrr1*, did not significantly alter the FLZ  
185 MIC compared to *MRR1*<sup>ancestral</sup> allele indicating that it was neither a constitutively activating nor a  
186 null mutation (Fig. 3C). The reintroduction of the Q1197\* mutation into *MRR1*<sup>L1191H</sup>, yielding

187 *MRR1<sup>L1191H+Q1197\*</sup>*, resulted in a 128-fold decrease in FLZ MIC (Fig. 3C) and 38-fold lower *MDR1*  
188 expression values (Fig. 3D) compared to a strain expressing *MRR1<sup>L1191H</sup>* and led to a phenotype  
189 that mirrored that of *MRR1<sup>ancestral</sup>*. Benomyl inducibility of these variants is discussed below.

190 *MRR1<sup>Y1126N+P1174P(t)</sup>* (from U07) and *MRR1<sup>Y1126N+S359\*</sup>* (from the closely-related U06, Fig. 1A),  
191 were similarly analyzed (Fig. 3B). Expression of *MRR1<sup>Y1126N</sup>* in U04 *mrr1*Δ created a strain with a  
192 high FLZ MIC (32-64 μg/ml, Fig. 3C) and *MDR1* expression (Fig. 3D), similar to that for strains  
193 with *MRR1<sup>Y813C</sup>* or *MRR1<sup>L1191H</sup>*. Addition of the frameshift-inducing indel at P1174, which causes  
194 a premature stop codon at N1176 removing 89 amino acids, yielding *MRR1<sup>Y1126N+P1174P(t)</sup>*, caused a  
195 128-fold decrease in the FLZ MIC and >100-fold decrease in *MDR1* expression relative to the  
196 strain expressing *MRR1<sup>Y1126N</sup>* again leading to a strain that phenocopied that with *MRR1<sup>ancestral</sup>* (Fig.  
197 3C and 3D). The addition of the indel at P1174 into an allele with a different constitutively active  
198 variant, Mrr1-Y813C, (*MRR1<sup>Y813C+P1174P(t)</sup>*) also caused a 256- and >100-fold decrease in FLZ MIC  
199 and *MDR1* expression, respectively, (Fig. 3C and 3D). In contrast, addition of a SNP causing an  
200 early stop codon at S359 to the allele with the activating Y1126N mutation (*MRR1<sup>Y1126N+S359\*</sup>*)  
201 yielded a strain that phenocopied U04 *mrr1*Δ, indicating this variant was inactive (Fig. 3C and  
202 3D). Together, these data suggest that the Y1126N mutation caused constitutive Mrr1 activity, that  
203 was subsequently suppressed by premature stop codons that either restored Mrr1 repression of  
204 *MDR1* (P1174P(t)) or eliminated activity (S359\*). The RNA-Seq analysis supported the results  
205 that premature stop codons near the very end of the protein converted constitutively active variants  
206 into ones that yielded expression profiles to those for *MRR1<sup>ancestral</sup>* and that were distinct from  
207 *mrr1*Δ (Fig. 1D).

208 In addition to the differences in basal activity, the individual mutations alone and in  
209 combination affected chemical inducibility by benomyl. Levels of *MDR1* were strongly induced

210 by benomyl in U04 *mrr1*Δ + *MRR1*<sup>ancestral</sup> (40-fold increase), but not in the U04 parental strain with  
211 high Mrr1 activity or its *mrr1*Δ derivative (Fig. 3D). Along with the native Mrr1-Y813C, two other  
212 constitutively active Mrr1 variants (Mrr1-L1191H and Mrr1-Y1126N) showed only a 2-3-fold  
213 increase in *MDR1* expression with benomyl (Fig. 3D) similar to what was observed for more FLZ  
214 resistant clinical isolates (Fig. 2D). Surprisingly, addition of the mutations that caused premature  
215 stop codons within the last 100 amino acids of Mrr1 to the constitutively active Mrr1-L1191H,  
216 Mrr1-Y1126N and Mrr1-Y813C variants restored inducibility by benomyl (Fig. 3D). In fact, there  
217 was a strong and significant inverse correlation between basal *MDR1* expression and fold induction  
218 by benomyl (Fig. 3E).

219 As in *C. albicans*, *C. lusitaniae* Mrr1 regulates the expression of the methylglyoxal  
220 reductase encoded by *MGDI* (*CLUG\_01281* or *GRP2*) (10, 29, 33, 38) and the multidrug efflux  
221 pump encoded by *FLUI* (*CLUG\_05825*) (10, 39, 40) (Table S1 and Fig. S3A). As with *MDR1*,  
222 expression of both *MGDI* and *FLUI* was significantly higher in strains encoding the constitutively  
223 active Mrr1-Y813C, Mrr1-Y1126N and Mrr1-L1191H variants, compared to a strain encoding the  
224 Mrr1-ancestral variant, and the absence of the C-terminus in strains with activating mutations  
225 caused a significant decrease in basal *MGDI* and *FLUI* expression (Fig. S3B and S3C). Benomyl  
226 induction of *MGDI*, like *MDR1* (Fig. S3D), was restored upon loss of the C-terminus of the  
227 constitutively active Mrr1 variants further supporting the strong negative correlation between basal  
228 expression and induction by benomyl (Fig. 2F and S3E). *FLUI* expression, however, was not  
229 induced by benomyl in any strain suggesting that *FLUI* regulation by Mrr1 differs from *MGDI*  
230 and *MDR1* (Fig. 2G and S3F). Interestingly, *MDR1* and *MGDI*, while highly differentially  
231 expressed depending on Mrr1 activity (~20-fold or greater), were both de-repressed in the absence  
232 of Mrr1, and *FLUI* was not and was only weakly differentially expressed (<2-fold) (Fig. 1D and

233 S2B). Together these data indicate the C-terminus of Mrr1 is required for constitutive expression  
234 of multiple Mrr1-regulated genes, but not for benomyl induction of the Mrr1-regulated genes  
235 tested (Fig. S3A). Combined with the Mrr1 activity across clinical isolates (Fig. 2D), these data  
236 indicate that in strains with constitutively active Mrr1 variants, there was selection for mutations  
237 to decrease Mrr1 activity, resulting in a mixed population containing constitutively active,  
238 truncated but inducible, and loss-of-function Mrr1 variants.

### 239 **Constitutive Mrr1 activity negatively impacts H<sub>2</sub>O<sub>2</sub> resistance**

240 We next sought to understand why mutations that reduce Mrr1 activity might repeatedly  
241 arise in this chronic infection. Previous studies have shown that overexpression of drug efflux  
242 pumps in drug resistant microbes can cause a fitness defect due to the energetic cost of constitutive  
243 pump production and activity in the absence of a selective substrate (41-43). Deletion of *MDR1*  
244 from U04 *mrr1*Δ +*MRR1*<sup>Y813C</sup>, which constitutively expresses *MDR1*, however, did not alter the  
245 growth rate across multiple carbon sources (Fig. 4A). In the absence of an obvious fitness defect,  
246 we considered factors present in the CF lung, which has been characterized as a highly inflamed  
247 environment containing an abundance of neutrophils and macrophages, and high oxidative stress  
248 (reviewed in (44, 45)). While little is known about the effects of fungus dominated chronic lung  
249 infections in CF, such as the infection from which these isolates originated, an analysis of  
250 cytokines within the bronchoalveolar lavage (BAL) fluid from the patient these isolates originated  
251 from showed pro-inflammatory cytokines (IL-8 and IL-1β) present were consistent with the  
252 neutrophilic environment seen in other patients with CF (Fig. 4B) (45).

253 In light of these findings, we investigated the effects of Mrr1 activity on reactive oxygen  
254 species (ROS) stress generated by hydrogen peroxide (H<sub>2</sub>O<sub>2</sub>), a stress strongly associated with high  
255 neutrophil counts. In a serial dilution assay, we found that isogenic strains encoding constitutively

256 active Mrr1 variants, while highly resistant to FLZ and diamide (Fig. S4A), had increased  
257 sensitivity to 4 mM H<sub>2</sub>O<sub>2</sub> compared to those expressing the Mrr1-ancestral variant (Fig. 4C).  
258 Diamide was used to illustrate relative Mrr1 activity instead of FLZ because serial dilution assays  
259 on rich medium (YPD) containing FLZ are not always representative of FLZ MIC, which are  
260 assessed in defined medium (Fig. S4B). Resistance to H<sub>2</sub>O<sub>2</sub> was restored by addition of mutations  
261 causing both mild and severe premature stop codons (Fig. 4C, S4A). The effects of Mrr1 activity  
262 on H<sub>2</sub>O<sub>2</sub> sensitivity were independent of strain background, as similar results were seen in isogenic  
263 strains in the U04 and U05 backgrounds (Fig. 4C and S4B). Surprisingly, deletion of *MDR1* from  
264 a strain encoding the constitutively active Mrr1-Y813C variant partially rescued growth (Fig. 4C  
265 and S4A), however, the absence of *MDR1* did not completely explain the differences as strains  
266 lacking *MRR1* had increased H<sub>2</sub>O<sub>2</sub> resistance despite elevated *MDR1* expression (Fig. 4C).  
267 Additionally, the double mutant U04 *mrr1*Δ *mdr1*Δ did not have increased resistance to H<sub>2</sub>O<sub>2</sub>  
268 compared to U04 *mrr1*Δ (Fig. 4C), suggesting this may be a complex response. A secondary assay  
269 quantifying growth after ~24 hours in liquid cultures containing 1 mM H<sub>2</sub>O<sub>2</sub>, though variable day-  
270 to-day, confirmed there was a reproducible difference in growth between strains encoding the low  
271 activity Mrr1-ancestral and constitutively active Mrr1-Y813C variants (Fig. 4D). Consistent with  
272 the plate-based assay, the absence of *MDR1* appeared to account for some but not all of the  
273 differences in growth in H<sub>2</sub>O<sub>2</sub> (Fig. 4D). To determine if this phenomenon was unique to *C.*  
274 *lusitaniae* Mrr1 we examined a set of isogenic *C. albicans* isolates (40), and *in vivo* or *in vitro*  
275 evolved *C. dubliniensis* isolates (30) expressing *MRR1* alleles containing GOF mutations. We  
276 found that for all *C. albicans* and *C. dubliniensis* strain sets tested, strains with high Mrr1 activity,  
277 which were more resistant to FLZ (40, 46, 47) and diamide, were more sensitive to H<sub>2</sub>O<sub>2</sub> than

278 strains with low Mrr1 activity or lacking *MRR1* (Fig. 4C). These data show that the Mrr1 activity  
279 driven tradeoff between FLZ and H<sub>2</sub>O<sub>2</sub> resistance is conserved across multiple *Candida* species.

280 A screen of isogenic strains for growth in varying concentrations of 48 chemical  
281 compounds resuspended from the Biolog Phenotype MicroArrays MicroPlates (Fig. S5) supported  
282 our findings that constitutive Mrr1 activity can increase sensitivity to oxidative stress. When  
283 comparing strains encoding either the low activity Mrr1-ancestral variant or the constitutively  
284 active Mrr1-Y813C variant, with either *MDR1* intact or removed, we found there were no  
285 differences in growth in the medium used to resuspend the Biolog compounds (Fig. S5A) and  
286 many conditions caused less than a 25% difference in growth (Fig. S5B). Unsurprisingly,  
287 constitutive Mrr1 activity conferred Mdr1-dependent resistance to twelve compounds, including  
288 three triazoles (FLZ, propiconazole, myclobutanil) (Fig. S5B and S5C). High Mrr1 activity also  
289 led to Mdr1-independent resistance to four additional compounds, including two other azoles (3-  
290 amino-1, 2, 4-triazole and miconazole nitrate) (Fig. S5B and S5C). Eight compounds caused a  
291 largely Mdr1-independent decrease in growth in strains encoding the constitutively active Mrr1-  
292 Y813C variant: 6-azauracil, berberine, BAPTA, lithium chloride, aminacrine, sodium metasilicate,  
293 pentamidine isethionate and potassium chromate (Fig. S5D). Interestingly, berberine and azaserine  
294 have previously been studied for their toxic effects on FLZ-resistant *Candida* strains (48, 49) and  
295 calcium inhibitors, such as BAPTA, have been reported to interfere with antifungal resistance (50,  
296 51). While diverse, these compounds are broadly reported to effect metabolism and respiration  
297 (52-56), which can lead to oxidative damage via the production of ROS, and/or DNA/RNA  
298 integrity, either by direct binding or oxidative damage (57-62). Strain lacking *MRR1* or encoding  
299 a functional Mrr1 variant that contains a premature stop codon (<100 amino acids removed) were

300 not sensitive to most of these compounds, suggesting secondary mutations causing a decrease or  
301 loss of Mrr1 activity could restore resistance in some environments (Fig. S5D).

302 To gain insight into the mechanisms that lead to differences in oxidative stress resistance  
303 between strains with different levels of Mrr1 activity, we compared the gene expression profiles  
304 after a 30-minute exposure to 0.5 mM H<sub>2</sub>O<sub>2</sub>, a partially inhibitory concentration. H<sub>2</sub>O<sub>2</sub> exposure  
305 had broad strain-independent effects on the transcriptome, altering expression of 786 genes (FC≥2,  
306 FR<0.05) including increased expression of *CLUG\_04072*, a homolog of *C. albicans* *CAT1*, which  
307 was previously shown to be important for the resistance of *C. lusitaniae* to H<sub>2</sub>O<sub>2</sub> (63) (Fig. S6A  
308 and Table S2). While there were subtle differences in the H<sub>2</sub>O<sub>2</sub> response between strains expressing  
309 the constitutively active Mrr1-Y813C variant compared to U04 *mrr1*Δ *MRR1*<sup>ancestral</sup> there were no  
310 clear patterns that would explain the difference in H<sub>2</sub>O<sub>2</sub> resistance (Fig. S6B). The majority of  
311 differences in gene expression were seen in the magnitude of induction of Mrr1-regulated genes  
312 by H<sub>2</sub>O<sub>2</sub>, a known inducer of Mrr1 in other species (29, 64), indicating that, as with benomyl (Fig.  
313 S3D-F), strains with constitutively active Mrr1 variants are less inducible than strains with low  
314 activity variants (Fig. S6B and S6C). Next, we investigated the expression of homologs of  
315 oxidative stress response (OSR) genes previously characterized in *C. albicans* and *S. cerevisiae*  
316 and found that there was not a significant Mrr1-dependent difference in basal or H<sub>2</sub>O<sub>2</sub>-induced  
317 expression of these genes (Fig. S6A). Genes assessed included the oxidative stress responsive  
318 transcription factor encoded by *CaCAP1* or *ScYAP1*, superoxide dismutase (*SOD2*, *SOD4*, *SOD6*),  
319 enzymes involved in the thioredoxin (*TSA1*, *TRX1*, *TRR1*) and glutathione (*GPX*, *GSH1*) systems,  
320 catalase (*CAT1*), and OSR genes involved in carbohydrate metabolism and the DNA-damage  
321 response (65, 66). Further analysis is required to better understand the link between constitutive  
322 Mrr1 activity and H<sub>2</sub>O<sub>2</sub> sensitivity, however these data highlight that the sensitivity is not due to

323 failure to induce an oxidative stress response, but more-likely a consequence of the activity of  
324 Mrr1-regulated genes, such as *MDR1* (Fig. S4A and S4C).

### 325 **Phenotype dynamics in chronic infection populations over time**

326 In light of the evidence for complex evolution of *MRR1* and the potentially advantageous  
327 phenotypes associated with both high and low Mrr1 activity, we sought to better understand the  
328 fractions of isolates with these Mrr1 associated traits over time. For this analysis, we used arrayed  
329 *C. lusitaniae* populations isolated from sputum or one BAL procedure collected from the same  
330 subject over three years, with the first time point approximately six months after the first clinical  
331 culture report of the high levels of “non-*albicans Candida*” (NAC) as shown in Fig. 5A. Upon  
332 plating isolates on agar with FLZ (8  $\mu$ g/ml) or H<sub>2</sub>O<sub>2</sub> (4 mM) (Fig. 5A), we found an inverse  
333 correlation between robust growth on FLZ and robust growth on H<sub>2</sub>O<sub>2</sub>. It was uncommon for  
334 isolates to be inhibited or uninhibited in both conditions (Fig. S5A). Isolates from the early samples  
335 were predominately sensitive to FLZ (10), but were largely resistant to H<sub>2</sub>O<sub>2</sub>. During and soon  
336 after the course of FLZ therapy (Sp1.5 and Sp2, respectively), however, there was an increase  
337 isolates that were more FLZ resistant but H<sub>2</sub>O<sub>2</sub>-sensitive (Fig. 5A). Subsequent samples from two  
338 years after the FLZ therapy was completed varied in the proportion of isolates that grew better on  
339 H<sub>2</sub>O<sub>2</sub> and FLZ. Thus, the *C. lusitaniae* population shifted back and forth between being dominated  
340 by isolates with higher H<sub>2</sub>O<sub>2</sub> resistance or higher FLZ resistance, but both phenotypes remained in  
341 the population over time (Fig. 5B).

### 342 **Discussion**

343 A population of *C. lusitaniae* isolates first described in Demers *et al.* (10) contained an  
344 unexpectedly large number of nonsynonymous mutations in the gene encoding the transcription  
345 factor, Mrr1, which regulated FLZ resistance, suggesting that Mrr1 activity was under strong



346 selective pressure *in vivo*. These *MRR1* alleles contained either one or two nonsynonymous SNPs  
347 or indels (Fig. 1A) and isolates with one mutation had on average higher FLZ resistance than those  
348 with two nonsynonymous *MRR1* mutations (Fig. 2A). While multiple studies have shown that  
349 constitutive Mrr1 activity is beneficial under multiple biologically relevant conditions, including  
350 exposure to azoles (10, 29), bacterial-produced toxins including phenazines (10), and host-  
351 produced antifungal peptides including histatin 5 (10, 40), it was unclear why *MRR1* alleles  
352 conferring low Mrr1 activity would be selected for in this population (10). Deconstruction of  
353 *MRR1* alleles with two mutations revealed an evolutionary path on which an activating mutation  
354 arose first, followed by suppressing mutations that either restored low basal activity but retained  
355 inducibility, or abolished Mrr1 activity altogether (Fig. 3 and S3). Interestingly, a *C. parapsilosis*  
356 strain was recently found to contain a central domain mutation and a C-terminal truncation  
357 (Mrr1<sup>P295L+Q1074\*</sup>) similar to the alleles described above, however, it is not currently known how  
358 these mutation impact Mrr1 activity and FLZ resistance (67), suggesting that selection for and  
359 against elevated Mrr1 activity may also occur in other *Candida* species.

360 Surprisingly, the RNA-Seq analysis of isogenic strains expressing different *MRR1* alleles  
361 revealed that *C. lusitaniae* Mrr1 appears to positively and negatively regulate genes expression  
362 (Fig. 1D) although further analysis is required to determine which genes are direct targets of Mrr1.  
363 Adding to previous studies in *C. lusitaniae* (10, 13) and *C. albicans* (29), we found that Mrr1  
364 positively regulates 41 genes with a fold change  $\geq 2$  and 102 genes with a fold change  $\geq 1.5$   
365 (FDR<0.05). Mrr1-induced genes include multiple MFS and ABC transporters (*i.e.* *MDR1*, *FLU1*,  
366 *CDRI*), methylglyoxal reductases (33), putative alcohol dehydrogenases, and a variety of other  
367 putative metabolic genes (Table S1). Constitutively active Mrr1 also appears to repress expression  
368 of 42 genes (fold change  $\geq 1.5$ , FDR<0.05), including multiple iron and/or copper transporters and

369 reductases, and sugar transporters (Table S1). These data combined with Bierman *et al.*, which  
370 showed that *C. lusitaniae* Mrr1 is induced by the spontaneously formed stress signal methylglyoxal  
371 (33), imply that Mrr1 may play a larger role in a generalized metabolic or stress response, beyond  
372 what has been previously studied in response to FLZ and xenobiotic stressors.

373         While the C-terminal region of *C. lusitaniae* Mrr1 was necessary for constitutive Mrr1  
374 activity, it was not required for induction of Mrr1-regulated genes, including *MDR1* and *MGDI*,  
375 in response to benomyl (Fig. 2D, 3 and S3). Subsequent addition of mutations resulting in the loss  
376 >200 amino acids, however, caused a slight decrease in FLZ resistance and *MDR1* expression, but  
377 these variants were no longer inducible by benomyl and phenocopied strains completely lacking  
378 *MRR1* (Fig. S1B, 3C and 3D). These data are consistent with previous studies showing C-terminal  
379 truncations prior to amino acid 944 in *C. albicans* *MRR1*, homologous to position 1116 in *C.*  
380 *lusitaniae* *MRR1*, caused a complete loss of CaMrr1 activity (68). The L11, L12 and U06 strains  
381 encoding Mrr1 variants with premature stop codons before amino acid 1116 similarly phenocopied  
382 *mrr1*Δ strains (Fig. 2C and 2D). Surprisingly, loss-of-function Mrr1 variants and *mrr1*Δ strains  
383 had intermediate expression of a subset of the most strongly differentially regulated genes  
384 compared to strains with low activity Mrr1 (Fig. S2B), which has not been observed in other  
385 *Candida* species (29, 31, 32). Additional studies are required to determine if this phenomenon is  
386 unique to *C. lusitaniae* or more broadly shared among non-*albicans* *Candida* species closely  
387 related to *C. lusitaniae*, such as *C. auris* (20, 26), and if any of the co-regulators of the Mrr1  
388 regulon described in *C. albicans* (64, 69, 70) are involved. These findings raised the question as  
389 to why, if constitutive Mrr1 was initially selected for, would it later be selected against *in vivo*,  
390 especially in the absence of an obvious growth defect (Fig. 4A and S5A).

391           Chronic lung infections are typically an inflamed environment (Fig. 4B) containing a high  
392   number of polymorphonuclear leukocytes (PMNs) that produce proteases, myeloperoxidases and  
393   ROS (71, 72), which is an important component of the immune system used to kill fungi (reviewed  
394   in (73)). In a screen of diverse chemical compounds, we found that strains with constitutive Mrr1  
395   activity were more strongly inhibited by multiple compounds that have previously been shown to  
396   cause damage through oxidative stress (Fig. S5B-D). When we specifically interrogated H<sub>2</sub>O<sub>2</sub>  
397   resistance, we found that *C. lusitaniae* strains encoding constitutively active Mrr1 variants were  
398   more sensitive than strain encoding low activity Mrr1 variants or lacking a functional Mrr1 (Fig.  
399   4A, S4). Sensitivity to H<sub>2</sub>O<sub>2</sub> and the compounds from the Biolog plates was at least partially  
400   dependent on Mdr1, though other Mrr1-regulated genes may still contribute to the decreased  
401   growth under conditions of oxidative stress (Fig. S4B, S5 and S6). Interestingly, the tradeoff  
402   between FLZ and H<sub>2</sub>O<sub>2</sub> resistance was conserved broadly among a time series of *C. lusitaniae*  
403   isolates and other *Candida* species (Fig. 4C and 5A).

404           As outlined in the model in Figure 5B, together these data highlight that changing  
405   environments within complex and dynamic chronic infections could contribute to the development  
406   of heterogeneous fungal populations. Though it appears that initial selection on the ancestral  
407   version of Mrr1 was driven by the need for increased Mrr1 activity, over time either these selective  
408   pressures were removed, or other pressures became dominant, resulting in a secondary wave of  
409   mutations. This secondary wave of mutations caused a decrease or loss of Mrr1 activity, which  
410   uniquely to *C. lusitaniae* further contributed towards a population with mixed levels of FLZ  
411   resistance (Fig. 5B). Though the exact selective pressures at play in this instance are unknown,  
412   these data highlight the importance of understanding how microbes evolve *in vivo*, as complex

413 environments, even in the absence of clinically used antifungals, can shape the microbial  
414 population and lead to antimicrobial resistance.

415

## 416 **Materials and Methods**

### 417 **Strains and growth conditions**

418 *Candida* strains used in this study are listed in Table S3. All strains were stored as frozen  
419 stocks with 25% glycerol at -80 °C and subcultured on YPD (1% yeast extract, 2% peptone, 2%  
420 glucose, 1.5% agar) plates at 30 °C. Strains were regularly grown in YPD liquid medium at 30 °C  
421 on a roller drum. Cells were grown in YNB (0.67% yeast nitrogen base medium with ammonium  
422 sulfate (RPI Corp)) liquid supplemented with either 2% glucose, 2% glycerol or 2% casamino  
423 acids and in RPMI-1640 (Sigma, containing L-glutamine, 165 mM MOPS, 2% glucose) liquid as  
424 noted. Media was supplemented with 8 µg/ml FLZ (stock 4 mg/ml in DMSO), 1 mM diamide  
425 (stock 58 mM in water) or 1-6 mM H<sub>2</sub>O<sub>2</sub> (30% w/v in water, ~9.8M) as noted. *Escherichia coli*  
426 strains were grown in LB with either 100 µg/ml carbenicillin or 15 µg/ml gentamycin as necessary  
427 to obtain plasmids. BAL fluid and sputum were obtained in accordance with institutional review  
428 board protocols as described in (74).

### 429 **DNA for gene knockout constructs**

430 Gene replacement constructs for knocking out *MRR1* (*CLUG\_00542*, as annotated in (10))  
431 and *MDR1* (*CLUG\_01938/9* (10)) were generated by fusion PCR as described in Grahl *et al.* (63).  
432 All primers (IDT) used are listed in Table S4. Briefly, 0.5 to 1.0 kb of the 5' and 3' regions flanking  
433 the gene was amplified from U04 DNA, isolated using the MasterPure Yeast DNA Purification  
434 Kit (epiCentre). The nourseothricin (*NAT1*) or hygromycin (*HygB*) resistance cassette was  
435 amplified from plasmids pNAT (75) and pYM70 (76), respectively, using the Zyppy Plasmid

436 Miniprep kit (Zymo Research). Nested primers within the amplified flanking regions were used to  
437 stitch the flanks and resistance cassette together. PCR products for transformation were purified  
438 and concentrated with the Zymo DNA Clean & Concentrator kit (Zymo Research) with a final  
439 elution in molecular biology grade water (Corning).

#### 440 **DNA for insertion of *NAT1* at neutral site in *C. lusitaniae* genome**

441 The approximately 4000 bp genomic region between *CLUG\_03302* and *CLUG\_03303* on  
442 chromosome 4, which was not predicted to contain any genes or promoter regions, was targeted  
443 as a potentially neutral insertions site. To create plasmid DH3261 containing *NAT1* flanked by  
444 homology to this region of chromosome 4, approximately 1.0 kb of the flanking regions (positions  
445 228,652 – 229,651 and 229,701 – 230,691) were amplified from U05 gDNA. All primers (IDT)  
446 used are listed in Table S4. *NAT1* was amplified from pNAT (75). PCR products were purified and  
447 concentrated then assembled with the vector (pRS426 (77) linearized with KpnI-HF and Sall-HF  
448 (New England BioLabs) and treated with the phosphatase rSAP (New England BioLabs)) using  
449 the NEBuilder HiFi DNA Assembly cloning kit (New England BioLabs). Assemblies were  
450 transformed into High Efficiency NEB®5-alpha competent *E. coli* (New England BioLabs). The  
451 *NAT1* insertion construct was isolated from DH3261 by digestion with KpnI-HF and Sall-HF (New  
452 England BioLabs).

#### 453 **Plasmids for complementation of *MRR1***

454 Plasmids for complementing *MRR1* were created as described in Biermann *et al*, 2020 (33).  
455 For naturally occurring *MRR1* alleles, we amplified i) the *MRR1* gene and terminator with ~1150  
456 bp upstream for homology from the appropriate strain's genomic DNA, ii) the selective marker,  
457 *HygB* from pYM70 (76), and iii) ~950 bp downstream of *MRR1* for homology from genomic U05  
458 (identical sequence for all relevant strains) using primers (IDT) listed in Table S4. PCR products

459 were cleaned up using the Zymo DNA Clean & Concentrator kit (Zymo Research) and assembled  
460 using the *S. cerevisiae* recombination technique previously described (78). Plasmids created in *S.*  
461 *cerevisiae* were isolated using a yeast plasmid miniprep kit (Zymo Research) and transformed into  
462 High Efficiency NEB®5-alpha competent *E. coli* (New England BioLabs). *E. coli* containing  
463 pMQ30 derived plasmids were selected for on LB containing 15 µg/ml gentamycin. Plasmids from  
464 *E. coli* were isolated using a Zyppy Plasmid Miniprep kit (Zymo Research) and subsequently  
465 verified by Sanger sequencing with the Dartmouth College Genomics and Molecular Biology  
466 Shared Resources Core. *MRR1* complementation plasmids were linearized with Not1-HF (New  
467 England BioLabs), cleaned up the Zymo DNA Clean & Concentrator kit (Zymo Research) and  
468 eluted in molecular biology grade water (Corning) before transformation of 2 µg into *C. lusitaniae*  
469 strain U04 *mrr1*Δ as described below.

470       The *MRR1*<sup>ancestral</sup> allele sequence was amplified from gDNA of a closely related *C.*  
471 *lusitaniae* isolate that had the same *MRR1* sequence but lacked any of the nonsynonymous  
472 mutation that varied among the population of *C. lusitaniae* isolates described here. This *MRR1*  
473 sequences does contain multiple synonymous and nonsynonymous mutations in comparison with  
474 that of the reference strains, ATCC 42720 (79). Additional *MRR1* alleles were amplified from  
475 gDNA from U04 (*MRR1*<sup>Y813C</sup>), U05 (*MRR1*<sup>L1191H+Q1197\*</sup>), U02 (*MRR*<sup>Y1126N+P1174P(t)</sup>) and U06  
476 (*MRR1*<sup>S359\*+Y1126N</sup>). While making the pMQ30<sup>*MRR1*-S359\*+Y1126N</sup> plasmid, one clone was identified that  
477 lacked the S359\* mutation resulting in the pMQ30<sup>*MRR1*-Y1126N</sup> plasmid. To create additional *MRR1*  
478 alleles that were not identified within any *C. lusitaniae* isolates, pieces of *MRR1* were selectively  
479 removed and repaired with DNA either containing or lacking the desired mutation. Because the  
480 L1191H and Q1197\* mutations were so close together, an alternate strategy was used to separate  
481 these mutations from the *MRR1*<sup>L1191H+Q1197\*</sup> allele. DNA fragments synthesized by IDT containing

482 either the L1191H or Q1197\* mutations alone (sequences in Table S4) were amplified then  
483 assembled with pMQ30<sup>MRR1-L1191H+Q1197\*</sup> (linearized with PvuI-HF) using the NEBuilder HiFi DNA  
484 Assembly cloning kit (New England BioLabs). To remove an unexpected nonsynonymous  
485 mutation in pMQ30<sup>MRR1-Q1197\*</sup>, this plasmid was digested with EcoNI and repaired with a piece of  
486 DNA amplified from U04 *mrr1*Δ+*MRR1*<sup>ancestral</sup> lacking the unwanted mutation. pMQ30<sup>MRR1</sup>  
487 complementation plasmids was digested with NotI-HF (New England BioLabs) for  
488 transformation.

### 489 **Strain construction**

490 Mutants were constructed as previously described in Grahl *et al.* using an expression free  
491 ribonucleoprotein CRISPR-Cas9 method (63). 1 to 2 μg of DNA for gene knockout constructs  
492 generated by PCR or 2 μg of digested plasmid, purified and concentrated with a final elution in  
493 molecular biology grade water (Corning), was used per transformation. Plasmids containing  
494 complementation and knockout constructs and resulting strains are listed in Table S3 and crRNAs  
495 (IDT) are listed in Table S4. Transformants were selected on YPD agar containing 200 μg/mL  
496 nourseothricin or 600 μg/mL hygromycin B.

### 497 **Drug susceptibility assays**

498 Minimum inhibitory concentration (MIC) was determined using a broth microdilution  
499 method as previously described (80) with slight modifications (10). Briefly, 2x10<sup>3</sup> cells were added  
500 to a two-fold dilution series of FLZ prepared in RPMI-1640, starting at an initial concentration of  
501 64 μg/ml, then incubated at 35 °C for 24 hours. The MIC was defined as the drug concentration  
502 that abolished visible growth compared to a drug-free control.

### 503 **Quantitative RT-PCR**

504 Overnight cultures were back diluted to an OD<sub>600</sub> of ~0.1 and grown for 6 hours in YPD

505 liquid medium at 30°C. 50 µg/ml of benomyl (stock 10 mg/ml in DMSO) or an equivalent volume  
506 of DMSO were added for experiments assessing the induction of Mrr1 activity. 7.5 µg RNA  
507 (harvested using the MasterPure Yeast RNA Purification Kit (Epicentre)) was DNase treated with  
508 the Turbo DNA-free Kit (Invitrogen). cDNA was synthesized from 300-500 ng of DNase-treated  
509 RNA using the RevertAid H Minus First Strand cDNA Synthesis Kit (Thermo Scientific),  
510 following the manufacturer's instructions for random hexamer primer (IDT) and GC rich template.  
511 qRT-PCR was performed on a CFX96 Real-Time System (Bio-Rad), using SsoFast Evergreen  
512 Supermix (Bio-Rad) with the primers listed in Table S4. Thermocycler conditions were as follows:  
513 95 °C for 30 s, 40 cycles of 95 °C for 5 s, 65 °C for 3 s and 95 °C for 5 s. Transcripts were normalized  
514 to *ACT1* expression.

### 515 **RNA Sequencing**

516 Overnight cultures were back diluted into YPD and grown to exponential (~8 h) twice, then  
517 treated with vehicle or 0.5 mM H<sub>2</sub>O<sub>2</sub> for 30 minutes, in biological triplicate. RNA was harvested  
518 from snap-frozen pellets (using liquid nitrogen) using the MasterPure Yeast RNA Purification Kit  
519 (Epicentre) and stored at -80 °C. RNA libraries were prepared using the Kapa mRNA HyperPrep  
520 kit (Roche) and sequenced using single-end 75 bp reads on the Illumina NextSeq500 platform. The  
521 data analysis pipeline is available in github repository  
522 ([https://github.com/stajichlab/RNASeq\\_Clusitaniae\\_MRR1](https://github.com/stajichlab/RNASeq_Clusitaniae_MRR1)) and archived as DOI: [To be  
523 generated]. FASTQ files were aligned to the ATCC 42720 (79) genome with the splice-site aware  
524 and SNP tolerant short read aligner GSNAP (v v2019-09-12) (81). The alignments were converted  
525 to sorted BAM files with Picard (v2.18.3; <https://broadinstitute.github.io/picard/>) and read counts  
526 computed with featureCounts (v1.6.2) (82) with updated genome annotation to correct truncated  
527 gene model for locus *CLUG\_00542*, and combine a single gene split into two,



528 *CLUG\_01938\_1939*; reasoning for these changes explained in (10). Differential gene expression  
529 analyses were performed with the edgeR (83) package in Bioconductor, by fitting a negative  
530 binomial linear model. The resulting *P* values were corrected for multiple testing with Benjamini-  
531 Hochberg to control the false discovery rate. Genes for which there were less than 2 counts per  
532 million (CPM) across the three (absent genes) were not included for differentially expressed gene  
533 analysis. Two separate linear models were created to define the Mrr1 regulon in control conditions  
534 alone and determine the interaction between Mrr1 activity and H<sub>2</sub>O<sub>2</sub> exposure.

535 To define the Mrr1 regulon in YPD alone we identified genes differentially expressed  
536 between strains with constitutive Mrr1 activity (U04 and U04 *mrr1*Δ +*MRR1*<sup>Y813C</sup>) and low Mrr1  
537 activity (U04 *mrr1*Δ, U04 *mrr1*Δ +*MRR1*<sup>ancestral</sup>, and U04 *mrr1*Δ +*MRR1*<sup>L1191H+Q1197\*</sup>); this model  
538 contained 5,474 genes. We discarded genes for which i) the log<sub>2</sub>FC greater than 1 (2-fold, see Fig.  
539 1B) or 0.585 (1.5-fold, see Table S1) with an FDR<0.05, (ii) the average CPMs for replicates was  
540 not greater than 10 for any strain, and ii) expression in both U04 and U04 *mrr1*Δ +*MRR1*<sup>Y813C</sup> was  
541 similar. Results are summarized in Table S1, including the Mrr1 regulon (Table S1a), and the  
542 normalized CPMs/gene used for this linear model (Table S1b).

543 To determine how constitutive Mrr1 activity impacted the response to H<sub>2</sub>O<sub>2</sub> we identified  
544 the overlap between the interaction between U04 or U04 *mrr1*Δ +*MRR1*<sup>Y813C</sup> and exposure to 0.5  
545 mM H<sub>2</sub>O<sub>2</sub>, as compared to the reference strain (U04 *mrr1*Δ +*MRR1*<sup>ancestral</sup>) and condition (YPD  
546 alone); this model contained 5600 genes. Results are summarized in Table S2, including the  
547 interaction between strains with constitutively active Mrr1 and H<sub>2</sub>O<sub>2</sub> (Table S2a), the effect of  
548 H<sub>2</sub>O<sub>2</sub> treatment (Table S2b), and all normalized CPMs/gene used for this linear model (Table S2c).

#### 549 **Biolog Phenotype MicroArrays analysis**

550 For the chemical sensitivity screen, the chemicals in Biolog plates PM22D and PM24C

551 were resuspended in 100  $\mu$ l YPD liquid and transferred to a sterile 96-well polystyrene plate  
552 (Fisher) for kinetic measurements. 100  $\mu$ l of cells adjusted to an OD of 0.01 in YPD was added to  
553 each well. Plates were incubated at 37 °C for 24 hours. A control plate containing no drug was  
554 grown simultaneously for comparison.

#### 555 **Serial dilution assays**

556 Following growth in YPD medium overnight with aeration at 30°C, cultures were diluted  
557 in water to an OD<sub>600</sub> of 1. Serial dilutions of ten-fold were carried out in a microtiter plate to yield  
558 six concentrations ranging from approximately 10<sup>7</sup> cells/ml (for OD<sub>600</sub> of 1) to approximately 10<sup>2</sup>  
559 cells/ml. 5  $\mu$ l of each dilution were applied to YPD plates containing 4 or 5 mM H<sub>2</sub>O<sub>2</sub> (stock 30%  
560 w/v, 9.8 M) or 1 mM diamide (stock 58 mM in water). Images were captured after incubation at  
561 37°C for 24 or 48 hours.

#### 562 **Luminex Analysis**

563 Cytokines in BAL fluid samples were measured (pg/ml) in singlicate by Luminex using a  
564 Millipore human cytokine multiplex kits (EMD Millipore Corporation, Billerica, MA) according  
565 to manufactures instructions. Assays were performed by the DartLab – Immune Monitoring and  
566 Flow Cytometry Resource core at Dartmouth.

#### 567 **Statistical analyses**

568 Statistical analyses were done using GraphPad Prism 6 (GraphPad Software). Unpaired  
569 Student's t-tests (two-tailed) with Welch's correction were used to evaluate the difference in FLZ  
570 MIC between isolates containing one of two mutations in *MRR1*. One and two-way ANOVA tests  
571 were performed across multiple samples with either Tukey's multiple comparison test for unpaired  
572 analyses or Sidak's multiple comparison test for paired analyses conducted in a pairwise fashion.

573 *P* values <0.05 were considered as significant for all analyses performed and are indicated with  
574 asterisks: \**P*<0.05, \*\**P*<0.01, \*\*\**P*<0.001 and \*\*\*\**P*<0.0001.

#### 575 **Data availability**

576 The data supporting the findings in this study are available within the paper and its  
577 supplemental information and are also available from the corresponding author upon request. The  
578 raw sequence reads from the RNA-Seq analysis have been deposited into NCBI sequence read  
579 archive under BioProject PRJNA680763. Raw and processed RNA-Seq count data are available  
580 in Gene Expression Omnibus (GSE162151) and include minor updates to the genome annotation  
581 and assembly for *C. lusitaniae*.

582

583 **Figures and figure legends**

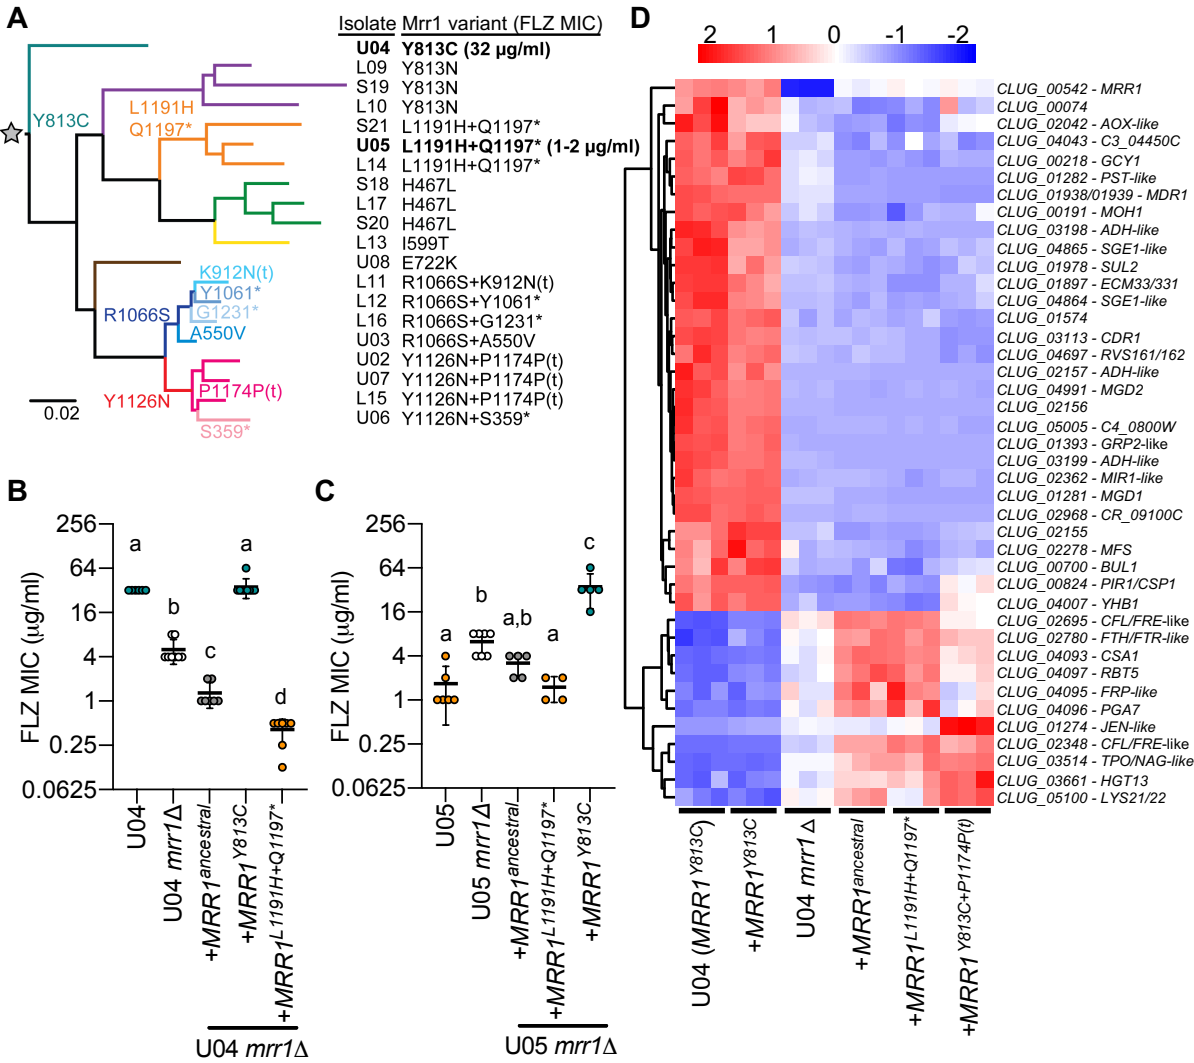

584

585 **Fig. 1: Naturally-evolved *MRR1* alleles confer higher or lower FLZ resistance compared to**

586 **strains expressing the ancestral *MRR1* allele. A, Maximum likelihood-based phylogeny based**

587 **on whole genome sequences of twenty previously sequenced *C. lusitaniae* isolates, modified from**

588 **Demers, *et al.* (10). Select branchpoints are marked with the Mrr1 variants present in subsequent**

589 **isolates. Mrr1 variants are identified by amino acid changes that resulted from SNPs or indels; \***

590 **indicates a stop codon. The one nucleotide indel in codons P1174 (insertion) and K912 (deletion)**

591 **cause frameshift mutations that resulted in early termination, denoted with 't', at N1176 and L927,**

592 respectively. Gray star at the root of the tree denotes the ‘ancestral’ *MRR1* sequence, which lacks  
593 any of the mutations listed. **B**, FLZ MIC for unaltered, *mrr1* $\Delta$  or *MRR1* complemented strains in  
594 the FLZ-resistant U04 (native allele *MRR1*<sup>Y813C</sup>) strain background. **C**, Same as in **B**, but in the  
595 FLZ-sensitive U05 strain background (native allele *MRR1*<sup>L1191H+Q1197\*</sup>). Strains containing the same  
596 *MRR1* allele in **B** and **C** are represented by circles of the same color. Data shown represents at  
597 least four independent assays on different days. One-way ANOVA with Tukey’s multiple  
598 comparisons test of log<sub>2</sub> transformed values for **B**: all pairwise comparisons, *P*<0.0001 and **C**: all  
599 pairwise comparisons, *P*<0.001. **D**, Heatmap of normalized counts per million (CPM) from RNA-  
600 Seq analysis for genes that were differentially regulated between both strains expressing *MRR1*<sup>Y813C</sup>  
601 (U04 and U04 *mrr1* $\Delta$  + *MRR1*<sup>Y813C</sup>) and U04 *mrr1* $\Delta$  + *MRR1*<sup>ancestral</sup>, U04 *mrr1* $\Delta$  +  
602 *MRR1*<sup>L1191H+Q1197\*</sup>, and U04 *mrr1* $\Delta$  when grown in liquid YPD medium. Complemented strains are  
603 denoted as by their respective *MRR1* alleles. Hierarchical clustering of row (genes) by Euclidean  
604 distance, cutoffs used were FDR <0.05 and fold change  $\geq 2$ ; additional information available in  
605 Table S1.

606

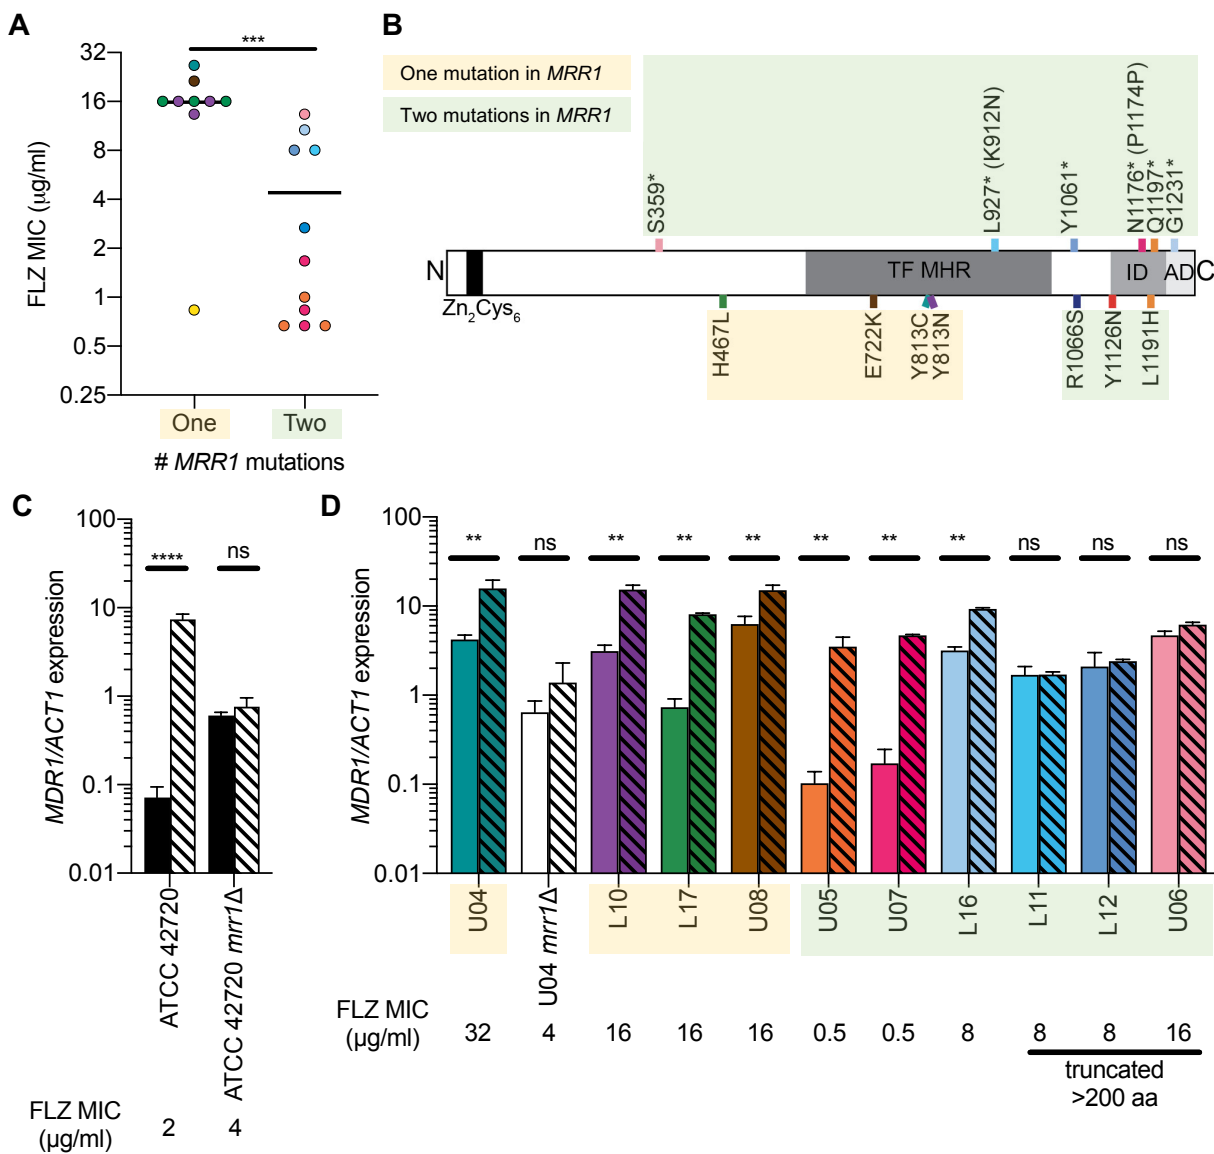

607

608 **Fig. 2: Premature stop codons in *Mrr1* differentially impact *MDR1* induction by benomyl.**

609 **A**, Mean FLZ MIC for each of the twenty clinical *C. lusitaniae* isolates in Fig. 1A separated by

610 the number of nonsynonymous mutations within *MRR1* (10); datapoints colored to match Fig. 1A,

611 2B and 2D. Mean of each group shown. Two-tailed unpaired t-test of log<sub>2</sub> transformed MIC values;

612 \*\*\*,  $P < 0.001$ . **B**, Schematic of *C. lusitaniae MRR1* annotated with putative regulatory domains

613 determined by sequence analysis or homology to *C. albicans* (22) and locations of truncating

614 (above) and activating (below) mutations, colored to match Fig. 1A, 2A and 2D. Putative domains

615 include the DNA binding domain with a zinc cluster motif ( $Zn_2Cys_6$ ; amino acids 33 to 61), the  
616 transcriptional regulatory middle homology region (MHR; amino acids ~607-1023), an inhibitory  
617 domain (ID; amino acids 1123 to 1217) and an activating domain (AD; amino acids 1218 to 1265).  
618 L927 and N1176 are the locations of stop codons caused by indels in codons K912 and P1174,  
619 respectively. **C** and **D**, *MDR1* expression normalized to *ACT1* in the absence (solid) or presence  
620 (striped) of 50  $\mu$ g/ml benomyl. Mean  $\pm$  SD of representative data in biological triplicate shown,  
621 similar trends observed on at least three different days. In **D**, Bars are colored to correspond to Fig.  
622 1A, and strains names are highlighted to correspond to the number of nonsynonymous SNPs in  
623 *MRR1*, yellow for one and green for two. **C** and **D**, Two-way ANOVA with Sidak's multiple  
624 comparisons test; \*\*,  $P < 0.0$ ; \*\*\*\*,  $P < 0.0001$ ; ns, not significant.

625

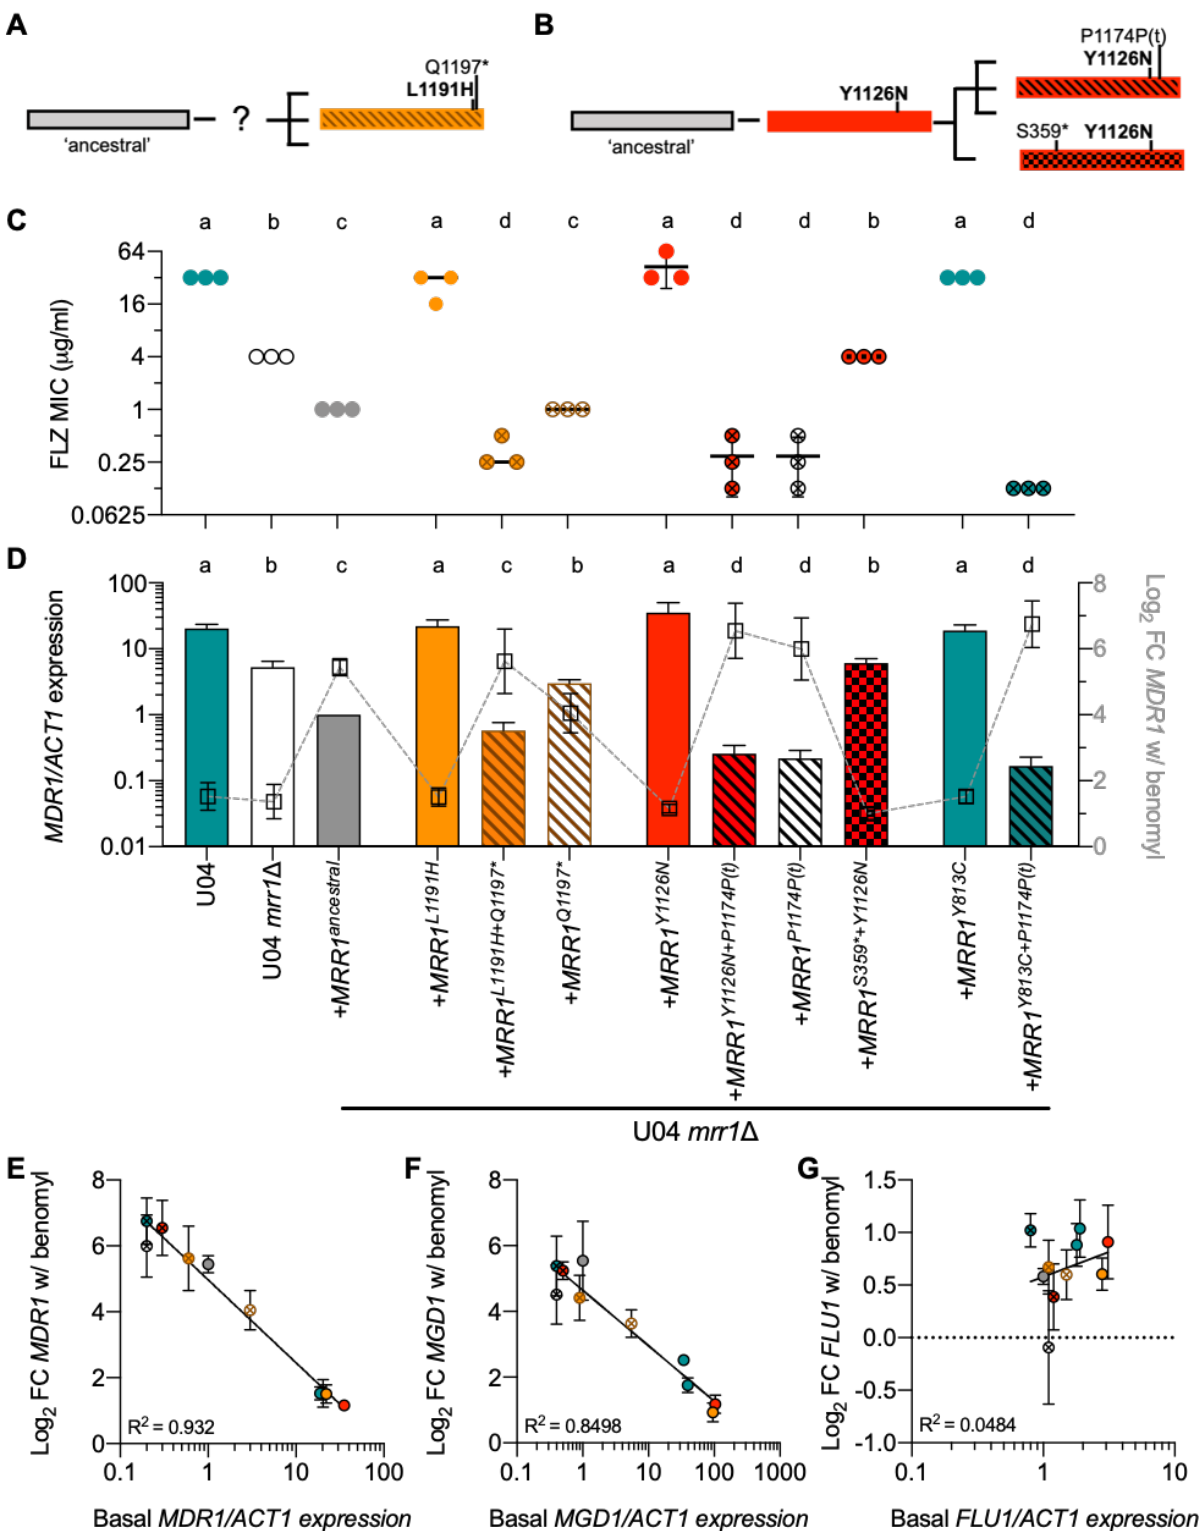

626

627 **Fig. 3: Premature stop codons repeatedly arose in constitutively active Mrr1 variants**

628 **resulting in reduced basal Mrr1 activity, but in some cases restored Mrr1 inducibility. A and**



629 **B**, Schematic of inferred evolution of *MRR1* alleles in the L1191H+Q1197\* (**A**) and Y1126N (**B**)  
630 lineages. **C**, FLZ MIC for U04, U04 *mrr1* $\Delta$  and *MRR1* complemented strains in the U04 *mrr1* $\Delta$   
631 background, denoted by allele. Mean  $\pm$  SD of three independent assays on different days shown.  
632 One-way ANOVA with Tukey's multiple comparisons test of log<sub>2</sub> transformed values; all pairwise  
633 comparisons,  $P < 0.01$ . **D**, *MDR1* expression normalized to *ACT1* from culture grown in YPD (bars,  
634 left y-axis). Mean  $\pm$  SD of three independent assays on different days; data from each day was  
635 normalized to the expression of U04 *mrr1* $\Delta$  +*MRR1*<sup>ancestral</sup>. One-way ANOVA with Tukey's  
636 multiple comparisons testing of log<sub>2</sub> transformed data; b-d,  $P < 0.05$ ; all other pairwise  
637 comparisons,  $P < 0.01$ . Overlaid with log<sub>2</sub> mean  $\pm$  SD fold change in normalized *MDR1* expression  
638 following exposure to 50  $\mu$ g/ml benomyl (squares, right y-axis); full data presented with statistics  
639 in Fig. S3D. **C** and **D**, FLZ MIC and *MDR1*/*ACT1* expression data are colored to match; the sample  
640 names are shown on the x-axis of Fig. 3D. **E-G**, Comparison of mean basal *MDR1* (**E**), *MGD1* (**F**)  
641 or *FLU1* (**G**) expression from Fig. 3D, S3B or S3C, excluding strains lacking functional *MRR1*,  
642 and mean  $\pm$  SD log<sub>2</sub> fold change (FC) induction following benomyl exposure from Fig. S3D-F.  
643 Goodness of fit r squared value for nonlinear regression shown.  
644

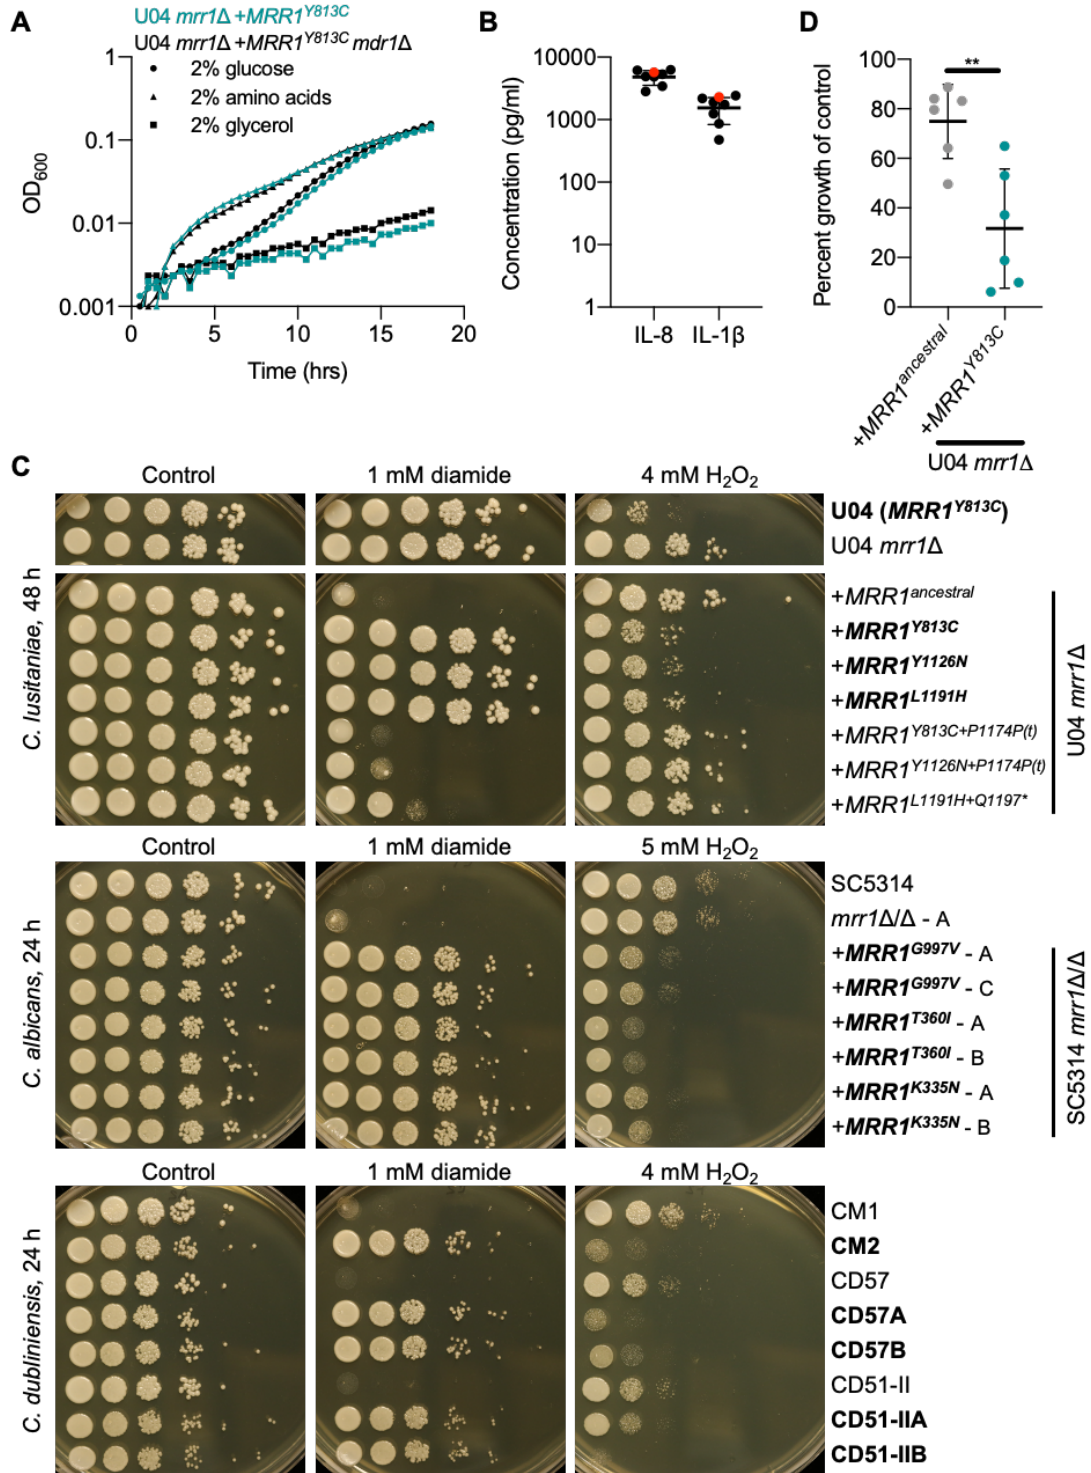

645

646 **Figure 4: Tradeoff between constitutive Mrr1 activity conferring increased resistance to**

647 **diamide but decreased resistance to hydrogen peroxide. A, Growth curve of U04 *mrr1Δ***

648 +*MRR1*<sup>Y813C</sup> (teal) and U04 *mrr1*Δ +*MRR1*<sup>Y813C</sup> *mdr1*Δ (black) grown in YNB medium  
649 supplemented with the indicated carbon source: glucose (circles), amino acids (triangles), or  
650 glycerol (squares). Mean ± SD of representative data shown; grown at 37 °C. **B**, Quantification  
651 of cytokines IL-8 and IL-1β in BAL fluid from the CF patient with (red) or seven patients  
652 without (black) *C. lusitaniae* in their lungs. Two-way ANOVA with Sidak's multiple  
653 comparisons testing found no significant differences. **C**, Serial dilution assays of *C. lusitaniae*,  
654 *C. albicans* and *C. dubliniensis* strains on YPD or YPD supplemented with the indicated  
655 concentration of diamide or H<sub>2</sub>O<sub>2</sub>. Strain names in bold have been shown in to contain GOF  
656 mutations in Mrr1 resulting in increased FLZ resistance (Fig. 3C and (40, 46, 47)). Plates were  
657 imaged after 24- or 48-hours growth at 37 °C, as indicated. **D**, Percent growth in well aerated 5  
658 ml YPD + 1 mM H<sub>2</sub>O<sub>2</sub> was calculated relative to the vehicle only control, after 22-24 hours  
659 growth at 37 °C. These data represent six independent assays performed on different days.  
660 Significance determined by paired t-test; \*\**P*<0.01.

661

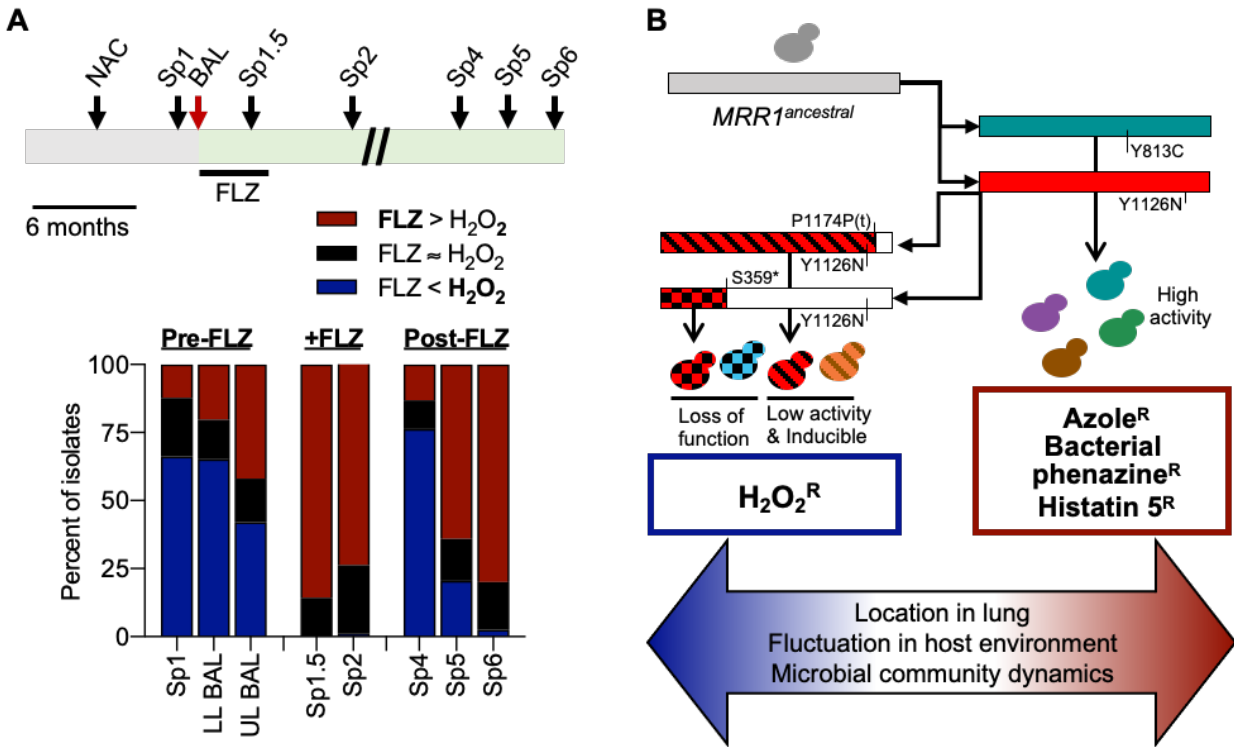

662

663 **Fig. 5: Tradeoff between FLZ and H<sub>2</sub>O<sub>2</sub> resistance persists in evolving *C. lusitaniae***

664 **populations during a chronic lung infection. A, Schematic of sampling timeline (top) and**

665 **histogram of the number of isolates that i) were mostly uninhibited on FLZ, but were inhibited**

666 **by H<sub>2</sub>O<sub>2</sub> (red), ii) were mostly uninhibited on H<sub>2</sub>O<sub>2</sub> but were inhibited by FLZ (blue), or iii) grew**

667 **similarly in both conditions (black). For the schematic, the gray bar represents the 6-10 months**

668 **before the BAL during which this patient was identified as being colonized by non-*albicans***

669 ***Candida* (NAC) species. *C. lusitaniae* was determined to be the dominate microbe in the upper**

670 **and lower lobe (UL and LL, respectively) BAL samples, which marks the start of the green bar.**

671 **Sp1 was obtained one month before the BAL and was retrospectively also found to contain**

672 **abundant *C. lusitaniae*. Sp1.5, Sp2, Sp4, Sp5 and Sp6 were obtained three, nine, thirty-two,**

673 **thirty-five and thirty-eight months, respectively, after the BAL and all contained *C. lusitaniae*. A**

674 **four-month course of FLZ therapy was given after the BAL. Scale of schematic is 1 inch = 6**

675 months. Multiple isolates were collected from each sample/timepoint and assayed for growth on  
676 YPD supplemented with 8  $\mu$ g/ml FLZ or 4 mM H<sub>2</sub>O<sub>2</sub> after 48 hours at 37 °C. Growth was scored  
677 as completely inhibited, partially inhibited or uninhibited compared to a YPD only control. **B**,  
678 Model for the evolution of *C. lusitaniae* *MRR1* in this population. Whole genome sequencing  
679 and mutation analyses have shown that following the initial infection with *C. lusitaniae* encoding  
680 the Mrr1-ancestral variant, a combination of exposure to different stimuli that changed overtime  
681 or by locations within the CF lung environment lead to the selection for multiple constitutively  
682 active Mrr1 variants, some of which persisted over time and others that were subsequently  
683 mutated again resulting in premature stop codons that resulted in reversion to low activity that  
684 was inducible or complete loss of Mrr1 activity. The balance between selective pressures  
685 resulted in a heterogeneous population of isolates with varying resistance to biologically and  
686 clinically important compounds.

687

688 **Acknowledgments**

689           We would like to thank J. Morschhäuser (Universität Würzburg) and L. Myers (Dartmouth  
690 College) for sharing *C. albicans* and *C. dubliniensis* strains. Research reported in this publication  
691 was supported by National Institute of Health (NIH) grant R01 AI127548 to D.A.H. from the  
692 National Institute of Allergy and Infectious Disease, R01 HL122372 to A.A. from the National  
693 Heart, Lung and Blood Institute, and National Institute of General Medical Sciences (NIGMS) of  
694 the NIH under award number T32GM008704 and AI133956 to E.G.D. J.E.S. is a CIFAR Fellow  
695 in the program Fungal Kingdom: Threats and Opportunities. This work was also supported by the  
696 Cystic Fibrosis Foundation Research Development Program (CFFRDP) STANTO19R0 for the  
697 Translational Research Core, and ASHARE20P0 to A.A. Sequencing services and specialized  
698 equipment was provided by the Genomics and Molecular Biology Shared Resource Core at  
699 Dartmouth, and Luminex analysis was performed by the DartLab – Immune Monitoring and Flow  
700 Cytometry Resource Core at Dartmouth, both supported by NCI Cancer Center Support Grant  
701 5P30CA023108-37. Equipment used was supported by the NIH IDeA award to Dartmouth BioMT  
702 P20-GM113132. Analyses were performed using the computational and data storage resources of  
703 the University of California-Riverside HPCC funded by grants from the National Science  
704 Foundation (NSF) (MRI-1429826) and NIH (1S10OD016290-01A1). The content is solely the  
705 responsibility of the authors and does not necessarily represent the official views of the NIH.  
706

## 707 References

- 708 1. Morley VJ, Woods RJ, Read AF. 2019. Bystander selection for antimicrobial resistance:  
709 Implications for patient health. *Trends Microbiol* 27:864-877.
- 710 2. Holmes AH, Moore LS, Sundsfjord A, Steinbakk M, Regmi S, Karkey A, Guerin PJ,  
711 Piddock LJ. 2016. Understanding the mechanisms and drivers of antimicrobial resistance. *Lancet*  
712 387:176-87.
- 713 3. Iwu CD, Korsten L, Okoh AI. 2020. The incidence of antibiotic resistance within and  
714 beyond the agricultural ecosystem: A concern for public health. *Microbiologyopen*  
715 doi:10.1002/mbo3.1035:e1035.
- 716 4. Pisoschi AM, Pop A, Georgescu C, Turcus V, Olah NK, Mathe E. 2018. An overview of  
717 natural antimicrobials role in food. *Eur J Med Chem* 143:922-935.
- 718 5. Challinor VL, Bode HB. 2015. Bioactive natural products from novel microbial sources.  
719 *Ann N Y Acad Sci* 1354:82-97.
- 720 6. Lieberman TD, Michel JB, Aingaran M, Potter-Bynoe G, Roux D, Davis MR, Jr.,  
721 Skurnik D, Leiby N, LiPuma JJ, Goldberg JB, McAdam AJ, Priebe GP, Kishony R. 2011.  
722 Parallel bacterial evolution within multiple patients identifies candidate pathogenicity genes. *Nat*  
723 *Genet* 43:1275-80.
- 724 7. Winstanley C, O'Brien S, Brockhurst MA. 2016. *Pseudomonas aeruginosa* Evolutionary  
725 Adaptation and Diversification in Cystic Fibrosis Chronic Lung Infections. *Trends Microbiol*  
726 24:327-37.
- 727 8. Lieberman TD, Flett KB, Yelin I, Martin TR, McAdam AJ, Priebe GP, Kishony R. 2014.  
728 Genetic variation of a bacterial pathogen within individuals with cystic fibrosis provides a record  
729 of selective pressures. *Nat Genet* 46:82-7.
- 730 9. Ciofu O, Lee B, Johannesson M, Hermansen NO, Meyer P, Hoiby N. 2008. Investigation  
731 of the algT operon sequence in mucoid and non-mucoid *Pseudomonas aeruginosa* isolates from  
732 115 Scandinavian patients with cystic fibrosis and in 88 in vitro non-mucoid revertants.  
733 *Microbiology (Reading)* 154:103-113.
- 734 10. Demers EG, Biermann AR, Masonjones S, Crocker AW, Ashare A, Stajich JE, Hogan  
735 DA. 2018. Evolution of drug resistance in an antifungal-naive chronic *Candida lusitaniae*  
736 infection. *Proc Natl Acad Sci U S A* 115:12040-12045.
- 737 11. Chen SC, Marriott D, Playford EG, Nguyen Q, Ellis D, Meyer W, Sorrell TC, Slavin M,  
738 Australian Candidaemia S. 2009. Candidaemia with uncommon *Candida* species: predisposing  
739 factors, outcome, antifungal susceptibility, and implications for management. *Clin Microbiol*  
740 *Infect* 15:662-9.
- 741 12. Favel A, Michel-Nguyen A, Peyron F, Martin C, Thomachot L, Datry A, Bouchara JP,  
742 Challier S, Noel T, Chastin C, Regli P. 2003. Colony morphology switching of *Candida*  
743 *lusitaniae* and acquisition of multidrug resistance during treatment of a renal infection in a  
744 newborn: case report and review of the literature. *Diagn Microbiol Infect Dis* 47:331-9.
- 745 13. Kannan A, Asner SA, Trachsel E, Kelly S, Parker J, Sanglard D. 2019. Comparative  
746 Genomics for the Elucidation of Multidrug Resistance in *Candida lusitaniae*. *mBio* 10.
- 747 14. Asner SA, Giulieri S, Diezi M, Marchetti O, Sanglard D. 2015. Acquired multidrug  
748 antifungal resistance in *Candida lusitaniae* during therapy. *Antimicrob Agents Chemother*  
749 59:7715-22.

- 750 15. Olm MR, West PT, Brooks B, Firek BA, Baker R, Morowitz MJ, Banfield JF. 2019.  
751 Genome-resolved metagenomics of eukaryotic populations during early colonization of  
752 premature infants and in hospital rooms. *Microbiome* 7:26.
- 753 16. Desnos-Ollivier M, Moquet O, Chouaki T, Guerin AM, Dromer F. 2011. Development of  
754 echinocandin resistance in *Clavispora lusitaniae* during caspofungin treatment. *J Clin Microbiol*  
755 49:2304-6.
- 756 17. Hawkins JL, Baddour LM. 2003. *Candida lusitaniae* infections in the era of fluconazole  
757 availability. *Clin Infect Dis* 36:e14-8.
- 758 18. Atkinson BJ, Lewis RE, Kontoyiannis DP. 2008. *Candida lusitaniae* fungemia in cancer  
759 patients: risk factors for amphotericin B failure and outcome. *Med Mycol* 46:541-6.
- 760 19. Reboutier D, Piednoel M, Boissard S, Conti A, Chevalier V, Florent M, Gibot-Leclerc S,  
761 Da Silva B, Chastin C, Fallague K, Favel A, Noel T, Ruprich-Robert G, Chapeland-Leclerc F,  
762 Papon N. 2009. Combination of different molecular mechanisms leading to fluconazole  
763 resistance in a *Candida lusitaniae* clinical isolate. *Diagn Microbiol Infect Dis* 63:188-93.
- 764 20. Shen XX, Zhou X, Kominek J, Kurtzman CP, Hittinger CT, Rokas A. 2016.  
765 Reconstructing the backbone of the *Saccharomycotina* yeast phylogeny using genome-scale data.  
766 *G3 (Bethesda)* 6:3927-3939.
- 767 21. Brown JL, Delaney C, Short B, Butcher MC, McKlound E, Williams C, Kean R, Ramage  
768 G. 2020. *Candida auris* phenotypic heterogeneity determines pathogenicity *in vitro*. *mSphere* 5.
- 769 22. Chow NA, Munoz JF, Gade L, Berkow EL, Li X, Welsh RM, Forsberg K, Lockhart SR,  
770 Adam R, Alanio A, Alastruey-Izquierdo A, Althawadi S, Arauz AB, Ben-Ami R, Bharat A,  
771 Calvo B, Desnos-Ollivier M, Escandon P, Gardam D, Gunturu R, Heath CH, Kurzai O, Martin  
772 R, Litvintseva AP, Cuomo CA. 2020. Tracing the Evolutionary History and Global Expansion of  
773 *Candida auris* Using Population Genomic Analyses. *mBio* 11.
- 774 23. Cuomo CA, Alanio A. 2020. Tracking a global threat: a new genotyping method for  
775 *Candida auris*. *mBio* 11.
- 776 24. Du H, Bing J, Hu T, Ennis CL, Nobile CJ, Huang G. 2020. *Candida auris*:  
777 Epidemiology, biology, antifungal resistance, and virulence. *PLoS Pathog* 16:e1008921.
- 778 25. Kean R, Brown J, Gulmez D, Ware A, Ramage G. 2020. *Candida auris*: A decade of  
779 understanding of an enigmatic pathogenic yeast. *J Fungi (Basel)* 6.
- 780 26. Munoz JF, Gade L, Chow NA, Loparev VN, Juieng P, Berkow EL, Farrer RA,  
781 Litvintseva AP, Cuomo CA. 2018. Genomic insights into multidrug-resistance, mating and  
782 virulence in *Candida auris* and related emerging species. *Nat Commun* 9:5346.
- 783 27. Zhang L, Xiao M, Watts MR, Wang H, Fan X, Kong F, Xu YC. 2015. Development of  
784 fluconazole resistance in a series of *Candida parapsilosis* isolates from a persistent candidemia  
785 patient with prolonged antifungal therapy. *BMC Infect Dis* 15:340.
- 786 28. Franz R, Kelly SL, Lamb DC, Kelly DE, Ruhnke M, Morschhauser J. 1998. Multiple  
787 molecular mechanisms contribute to a stepwise development of fluconazole resistance in clinical  
788 *Candida albicans* strains. *Antimicrob Agents Chemother* 42:3065-72.
- 789 29. Morschhauser J, Barker KS, Liu TT, Bla BWJ, Homayouni R, Rogers PD. 2007. The  
790 transcription factor Mrr1p controls expression of the *MDR1* efflux pump and mediates multidrug  
791 resistance in *Candida albicans*. *PLoS Pathog* 3:e164.
- 792 30. Schubert S, Rogers PD, Morschhauser J. 2008. Gain-of-function mutations in the  
793 transcription factor *MRR1* are responsible for overexpression of the *MDR1* efflux pump in  
794 fluconazole-resistant *Candida dubliniensis* strains. *Antimicrob Agents Chemother* 52:4274-80.



- 795 31. Dunkel N, Blass J, Rogers PD, Morschhauser J. 2008. Mutations in the multi-drug  
796 resistance regulator *MRR1*, followed by loss of heterozygosity, are the main cause of *MDR1*  
797 overexpression in fluconazole-resistant *Candida albicans* strains. *Mol Microbiol* 69:827-40.
- 798 32. Branco J, Silva AP, Silva RM, Silva-Dias A, Pina-Vaz C, Butler G, Rodrigues AG,  
799 Miranda IM. 2015. Fluconazole and voriconazole resistance in *Candida parapsilosis* is conferred  
800 by gain-of-function mutations in *MRR1* transcription factor gene. *Antimicrob Agents Chemother*  
801 59:6629-33.
- 802 33. Biermann AR, Demers EG, Hogan DA. 2020. Mrr1 regulation of methylglyoxal  
803 catabolism and methylglyoxal-induced fluconazole resistance in *Candida lusitanae*. bioRxiv  
804 doi:10.1101/2020.05.18.101840.
- 805 34. Krugel H, Fiedler G, Haupt I, Sarfert E, Simon H. 1988. Analysis of the nourseothricin-  
806 resistance gene (*nat*) of *Streptomyces noursei*. *Gene* 62:209-17.
- 807 35. Staib P, Moran GP, Sullivan DJ, Coleman DC, Morschhauser J. 2001. Isogenic strain  
808 construction and gene targeting in *Candida dubliniensis*. *J Bacteriol* 183:2859-65.
- 809 36. Karababa M, Coste AT, Rognon B, Bille J, Sanglard D. 2004. Comparison of gene  
810 expression profiles of *Candida albicans* azole-resistant clinical isolates and laboratory strains  
811 exposed to drugs inducing multidrug transporters. *Antimicrob Agents Chemother* 48:3064-79.
- 812 37. Harry JB, Oliver BG, Song JL, Silver PM, Little JT, Choiniere J, White TC. 2005. Drug-  
813 induced regulation of the *MDR1* promoter in *Candida albicans*. *Antimicrob Agents Chemother*  
814 49:2785-92.
- 815 38. Kwak MK, Ku M, Kang SO. 2018. Inducible NAD(H)-linked methylglyoxal  
816 oxidoreductase regulates cellular methylglyoxal and pyruvate through enhanced activities of  
817 alcohol dehydrogenase and methylglyoxal-oxidizing enzymes in glutathione-depleted *Candida*  
818 *albicans*. *Biochim Biophys Acta Gen Subj* 1862:18-39.
- 819 39. Calabrese D, Bille J, Sanglard D. 2000. A novel multidrug efflux transporter gene of the  
820 major facilitator superfamily from *Candida albicans* (*FLU1*) conferring resistance to  
821 fluconazole. *Microbiology* 146 ( Pt 11):2743-54.
- 822 40. Hampe IAI, Friedman J, Edgerton M, Morschhauser J. 2017. An acquired mechanism of  
823 antifungal drug resistance simultaneously enables *Candida albicans* to escape from intrinsic host  
824 defenses. *PLoS Pathog* 13:e1006655.
- 825 41. Alonso A, Martinez JL. 2001. Expression of multidrug efflux pump SmeDEF by clinical  
826 isolates of *Stenotrophomonas maltophilia*. *Antimicrob Agents Chemother* 45:1879-81.
- 827 42. Praski Alzrigat L, Huseby DL, Brandis G, Hughes D. 2017. Fitness cost constrains the  
828 spectrum of *marR* mutations in ciprofloxacin-resistant *Escherichia coli*. *J Antimicrob Chemother*  
829 72:3016-3024.
- 830 43. Popp C, Hampe IAI, Hertlein T, Ohlsen K, Rogers PD, Morschhauser J. 2017.  
831 Competitive fitness of fluconazole-resistant clinical *Candida albicans* strains. *Antimicrob*  
832 *Agents Chemother* 61.
- 833 44. Rottner M, Freyssinet JM, Martinez MC. 2009. Mechanisms of the noxious inflammatory  
834 cycle in cystic fibrosis. *Respir Res* 10:23.
- 835 45. Laval J, Ralhan A, Hartl D. 2016. Neutrophils in cystic fibrosis. *Biol Chem* 397:485-96.
- 836 46. Moran GP, Sanglard D, Donnelly SM, Shanley DB, Sullivan DJ, Coleman DC. 1998.  
837 Identification and expression of multidrug transporters responsible for fluconazole resistance in  
838 *Candida dubliniensis*. *Antimicrob Agents Chemother* 42:1819-30.
- 839 47. Moran GP, Sullivan DJ, Henman MC, McCreary CE, Harrington BJ, Shanley DB,  
840 Coleman DC. 1997. Antifungal drug susceptibilities of oral *Candida dubliniensis* isolates from

- 841 human immunodeficiency virus (HIV)-infected and non-HIV-infected subjects and generation of  
842 stable fluconazole-resistant derivatives *in vitro*. *Antimicrob Agents Chemother* 41:617-23.
- 843 48. da Silva AR, de Andrade Neto JB, da Silva CR, Campos Rde S, Costa Silva RA, Freitas  
844 DD, do Nascimento FB, de Andrade LN, Sampaio LS, Grangeiro TB, Magalhaes HI, Cavalcanti  
845 BC, de Moraes MO, Nobre Junior HV. 2016. Berberine antifungal activity in fluconazole-  
846 resistant pathogenic yeasts: Action mechanism evaluated by flow cytometry and biofilm growth  
847 inhibition in *Candida* spp. *Antimicrob Agents Chemother* 60:3551-7.
- 848 49. Wakiec R, Gabriel I, Prasad R, Becker JM, Payne JW, Milewski S. 2008. Enhanced  
849 susceptibility to antifungal oligopeptides in yeast strains overexpressing ABC multidrug efflux  
850 pumps. *Antimicrob Agents Chemother* 52:4057-63.
- 851 50. Liu S, Yue L, Gu W, Li X, Zhang L, Sun S. 2016. Synergistic effect of fluconazole and  
852 calcium channel blockers against resistant *Candida albicans*. *PLoS One* 11:e0150859.
- 853 51. Kaur R, Castano I, Cormack BP. 2004. Functional genomic analysis of fluconazole  
854 susceptibility in the pathogenic yeast *Candida glabrata*: roles of calcium signaling and  
855 mitochondria. *Antimicrob Agents Chemother* 48:1600-13.
- 856 52. Ludewig G, Williams JM, Li Y, Staben C. 1994. Effects of pentamidine isethionate on  
857 *Saccharomyces cerevisiae*. *Antimicrob Agents Chemother* 38:1123-8.
- 858 53. Cox LJ, Dooley D, Beumer R. 1990. Effect of lithium chloride and other inhibitors on the  
859 growth of *Listeria* spp. *Food Microbiology* 7:311-325.
- 860 54. Xu Y, Wang Y, Yan L, Liang RM, Dai BD, Tang RJ, Gao PH, Jiang YY. 2009.  
861 Proteomic analysis reveals a synergistic mechanism of fluconazole and berberine against  
862 fluconazole-resistant *Candida albicans*: endogenous ROS augmentation. *J Proteome Res* 8:5296-  
863 304.
- 864 55. Dhamgaye S, Devaux F, Vandeputte P, Khandelwal NK, Sanglard D, Mukhopadhyay G,  
865 Prasad R. 2014. Molecular mechanisms of action of herbal antifungal alkaloid berberine, in  
866 *Candida albicans*. *PLoS One* 9:e104554.
- 867 56. Henderson G. 1989. A comparison of the effects of chromate, molybdate and cadmium  
868 oxide on respiration in the yeast *Saccharomyces cerevisiae*. *Biol Met* 2:83-8.
- 869 57. Edwards KJ, Jenkins TC, Neidle S. 1992. Crystal structure of a pentamidine-  
870 oligonucleotide complex: implications for DNA-binding properties. *Biochemistry* 31:7104-9.
- 871 58. Lerman LS. 1961. Structural considerations in the interaction of DNA and acridines. *J*  
872 *Mol Biol* 3:18-30.
- 873 59. Krey AK, Hahn FE. 1969. Berberine: complex with DNA. *Science* 166:755-7.
- 874 60. Exinger F, Lacroute F. 1992. 6-Azauracil inhibition of GTP biosynthesis in  
875 *Saccharomyces cerevisiae*. *Curr Genet* 22:9-11.
- 876 61. Handschumacher RE. 1960. Orotidylic acid decarboxylase: inhibition studies with  
877 azauridine 5'-phosphate. *J Biol Chem* 235:2917-9.
- 878 62. Bridgewater LC, Manning FC, Patierno SR. 1994. Base-specific arrest of *in vitro* DNA  
879 replication by carcinogenic chromium: relationship to DNA interstrand crosslinking.  
880 *Carcinogenesis* 15:2421-7.
- 881 63. Grahl N, Demers EG, Crocker AW, Hogan DA. 2017. Use of RNA-protein complexes  
882 for genome editing in non-*albicans* *Candida* species. *mSphere* 2.
- 883 64. Schubert S, Barker KS, Znaidi S, Schneider S, Dierolf F, Dunkel N, Aid M, Boucher G,  
884 Rogers PD, Raymond M, Morschhauser J. 2011. Regulation of efflux pump expression and drug  
885 resistance by the transcription factors Mrr1, Upc2, and Cap1 in *Candida albicans*. *Antimicrob*  
886 *Agents Chemother* 55:2212-23.

- 887 65. Enjalbert B, Nantel A, Whiteway M. 2003. Stress-induced gene expression in *Candida*  
888 *albicans*: absence of a general stress response. *Mol Biol Cell* 14:1460-7.
- 889 66. Enjalbert B, Smith DA, Cornell MJ, Alam I, Nicholls S, Brown AJ, Quinn J. 2006. Role  
890 of the Hog1 stress-activated protein kinase in the global transcriptional response to stress in the  
891 fungal pathogen *Candida albicans*. *Mol Biol Cell* 17:1018-32.
- 892 67. Arastehfar A, Daneshnia F, Hilmioglu-Polat S, Fang W, Yasar M, Polat F, Metin DY,  
893 Rigole P, Coenye T, Ilkit M, Pan W, Liao W, Hagen F, Kostrzewa M, Perlin DS, Lass-Flörl C,  
894 Boekhout T. 2020. First report of candidemia clonal outbreak caused by emerging fluconazole-  
895 resistant *Candida parapsilosis* isolates harboring Y132F and/or Y132F+K143R in Turkey.  
896 *Antimicrob Agents Chemother* 64.
- 897 68. Schubert S, Popp C, Rogers PD, Morschhauser J. 2011. Functional dissection of a  
898 *Candida albicans* zinc cluster transcription factor, the multidrug resistance regulator Mrr1.  
899 *Eukaryot Cell* 10:1110-21.
- 900 69. Liu Z, Myers LC. 2017. *Candida albicans* Swi/Snf and Mediator Complexes  
901 Differentially Regulate Mrr1-Induced *MDR1* Expression and Fluconazole Resistance.  
902 *Antimicrob Agents Chemother* 61.
- 903 70. Mogavero S, Tavanti A, Senesi S, Rogers PD, Morschhauser J. 2011. Differential  
904 requirement of the transcription factor Mcm1 for activation of the *Candida albicans* multidrug  
905 efflux pump *MDR1* by its regulators Mrr1 and Cap1. *Antimicrob Agents Chemother* 55:2061-6.
- 906 71. Hull J, Vervaart P, Grimwood K, Phelan P. 1997. Pulmonary oxidative stress response in  
907 young children with cystic fibrosis. *Thorax* 52:557-60.
- 908 72. Brown RK, Kelly FJ. 1994. Evidence for increased oxidative damage in patients with  
909 cystic fibrosis. *Pediatr Res* 36:487-93.
- 910 73. Warris A, Ballou ER. 2019. Oxidative responses and fungal infection biology. *Semin*  
911 *Cell Dev Biol* 89:34-46.
- 912 74. Hogan DA, Willger SD, Dolben EL, Hampton TH, Stanton BA, Morrison HG, Sogin  
913 ML, Czum J, Ashare A. 2016. Analysis of lung microbiota in bronchoalveolar lavage, protected  
914 brush and sputum samples from subjects with mild-to-moderate cystic fibrosis lung disease.  
915 *PLoS One* 11:e0149998.
- 916 75. Min K, Ichikawa Y, Woolford CA, Mitchell AP. 2016. *Candida albicans* gene deletion  
917 with a transient CRISPR-Cas9 system. *mSphere* 1.
- 918 76. Basso LR, Jr., Bartiss A, Mao Y, Gast CE, Coelho PS, Snyder M, Wong B. 2010.  
919 Transformation of *Candida albicans* with a synthetic hygromycin B resistance gene. *Yeast*  
920 27:1039-48.
- 921 77. Christianson TW, Sikorski RS, Dante M, Shero JH, Hieter P. 1992. Multifunctional yeast  
922 high-copy-number shuttle vectors. *Gene* 110:119-22.
- 923 78. Shanks RM, Caiazza NC, Hinsa SM, Toutain CM, O'Toole GA. 2006. *Saccharomyces*  
924 *cerevisiae*-based molecular tool kit for manipulation of genes from gram-negative bacteria. *Appl*  
925 *Environ Microbiol* 72:5027-36.
- 926 79. Butler G, Rasmussen MD, Lin MF, Santos MA, Sakthikumar S, Munro CA, Rheinbay E,  
927 Grabherr M, Forche A, Reedy JL, Agrafioti I, Arnaud MB, Bates S, Brown AJ, Brunke S,  
928 Costanzo MC, Fitzpatrick DA, de Groot PW, Harris D, Hoyer LL, Hube B, Klis FM, Kodira C,  
929 Lennard N, Logue ME, Martin R, Neiman AM, Nikolaou E, Quail MA, Quinn J, Santos MC,  
930 Schmitzberger FF, Sherlock G, Shah P, Silverstein KA, Skrzypek MS, Soll D, Staggs R,  
931 Stansfield I, Stumpf MP, Sudbery PE, Srikantha T, Zeng Q, Berman J, Berriman M, Heitman J,

- 932 Gow NA, Lorenz MC, Birren BW, Kellis M, et al. 2009. Evolution of pathogenicity and sexual  
933 reproduction in eight *Candida* genomes. *Nature* 459:657-62.
- 934 80. CLSI. 2012. Reference method for broth dilution antifungal susceptibility testing of  
935 yeasts, vol CLSI document M27-S4. Wayne: Clinical and Laboratory Standard Institute.
- 936 81. Wu TD, Reeder J, Lawrence M, Becker G, Brauer MJ. 2016. GMAP and GSNAP for  
937 Genomic Sequence Alignment: Enhancements to Speed, Accuracy, and Functionality. *Methods*  
938 *Mol Biol* 1418:283-334.
- 939 82. Liao Y, Smyth GK, Shi W. 2014. featureCounts: an efficient general purpose program for  
940 assigning sequence reads to genomic features. *Bioinformatics* 30:923-30.
- 941 83. Robinson MD, McCarthy DJ, Smyth GK. 2010. edgeR: a Bioconductor package for  
942 differential expression analysis of digital gene expression data. *Bioinformatics* 26:139-40.  
943
- 944
